# Supplementary material
Source: PubMed Central journal article supplement (PMC2860437)
Supplement: JCO.2009.26.7245_1.pdf [file JCO.2009.26.7245_1.pdf]

# Intra-tumor Heterogeneity and Precision of Microarray-Based Predictors of Breast Cancer Biology and Clinical Outcome

Datto et al

## Supplemental Figure Legends

**Supplemental Fig 1.** Bootstrap analysis ( $n_{boot} = 1000$ ) using the R/Bioconductor package 'Pvclust'<sup>35</sup> validates the robustness of the average correlation HCA performed on the 50 replicate samples (Figure 2A). Approximate Unbiased statistics (numbers in red) verify that all samples cluster at a significant level except for samples F1 and I1 (highlighted). Sample F discordance can be seen in both the HCA dendrogram in Fig 2A and the unscaled PCA plot in Fig 2B. One replicate from sample I demonstrates lower significance in clustering compared to the other two replicates. This can be seen in the difference in branch height on the original HCA, and in the unscaled PCA results.

**Supplemental Fig 2.** Predictive imprecision is directly related to the proportion of genes with high intra-tumor variance. A) The contribution of intra-tumor variance to total variance for genes included in each of the array-based predictors is demonstrated by A) histogram and individual scatterplots for predictors of B) ER pathway, C) recurrence, D) adriamycin sensitivity, and E) docetaxel sensitivity.

**Table S5.** Multivariate and multivariable analyses of variance for the principal components and the multi-gene predictors demonstrate that tumor content is not a confounding factor in these analyses. For the top two components identified in the PCA (Figure 2B), a multivariate ANOVA test was used to evaluate the effects of subject and tumor content on the global patterns of gene expression. As indicated by the Pillai-Bartlett test statistics, there is a strongly significant effect of subject on the summary measures (very small p-value), while tumor content is not significant. Likewise, for the four multi-gene

signatures under investigation (ER-pathway, Recurrence Risk, Adriamycin- and Docetaxel-chemosensitivity), ANOVA models are provided with the type I sum-of-squares test for each independent covariate. As indicated, the effect of replicates within subject is strongly significant, while tumor content has minimal impact on these signatures. Abbreviations: df, degrees of freedom; SS, sum of squares; MS, mean squares; Res, residual effects.

# Supplemental Figures

## Barry et al. Supplemental Figure 1

Cluster dendrogram with AU/BP values (%)

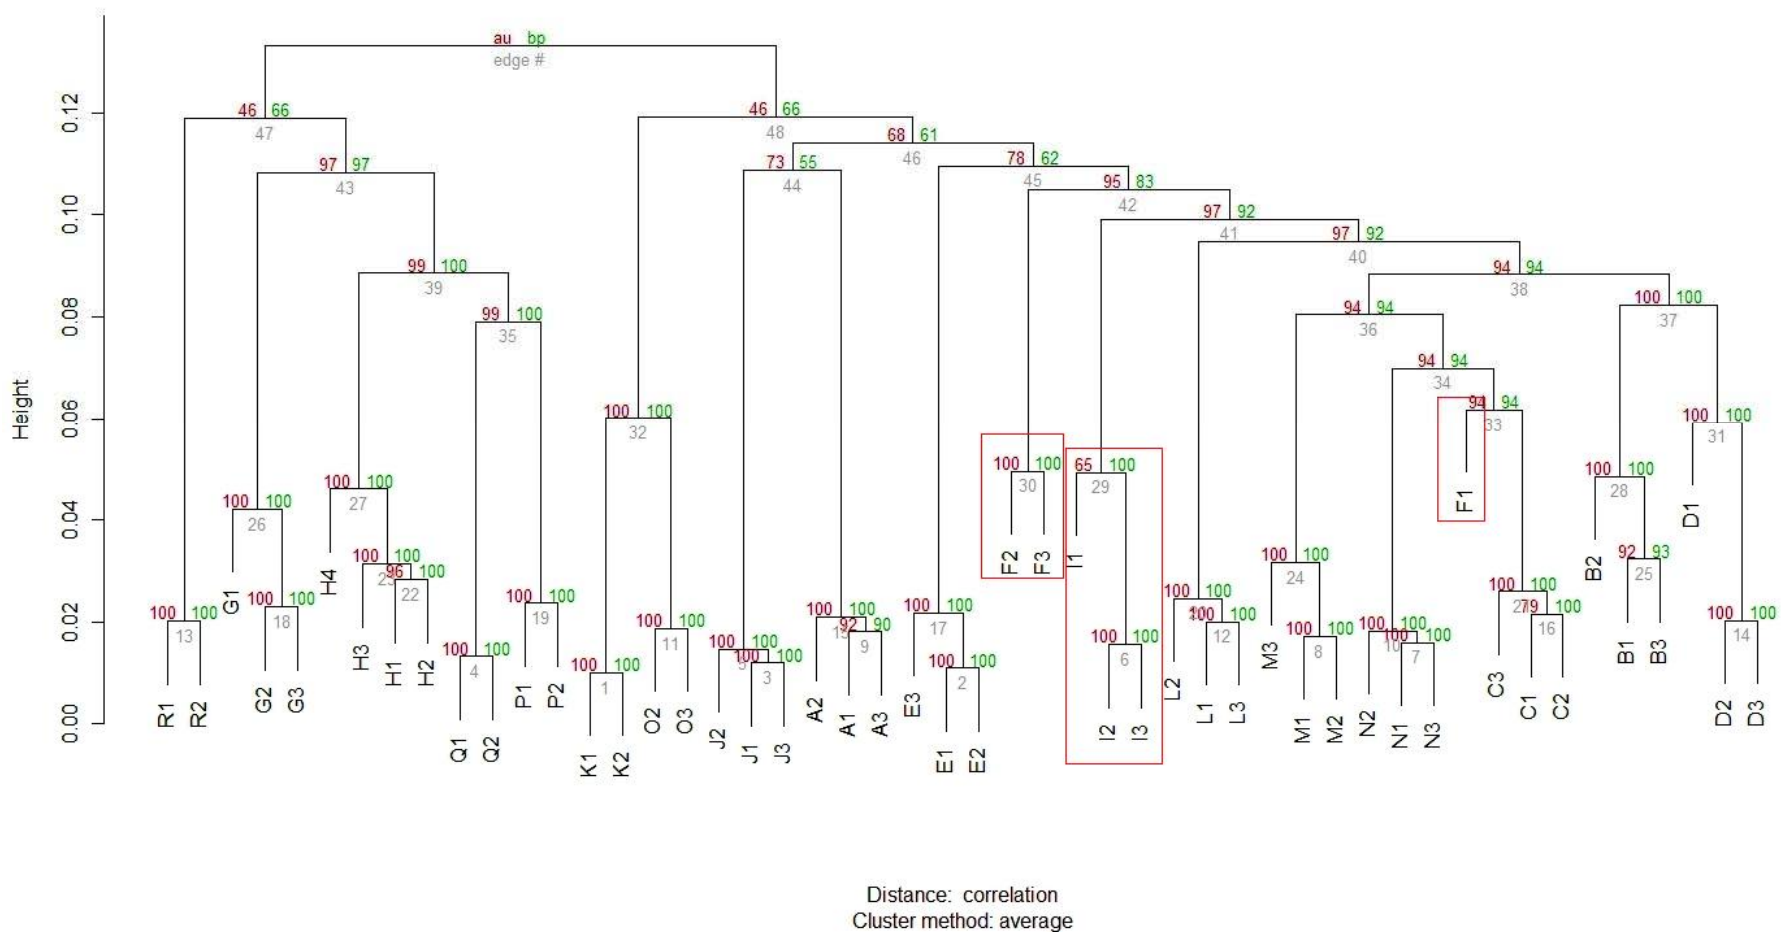

Barry et al. Supplemental Figure 2A

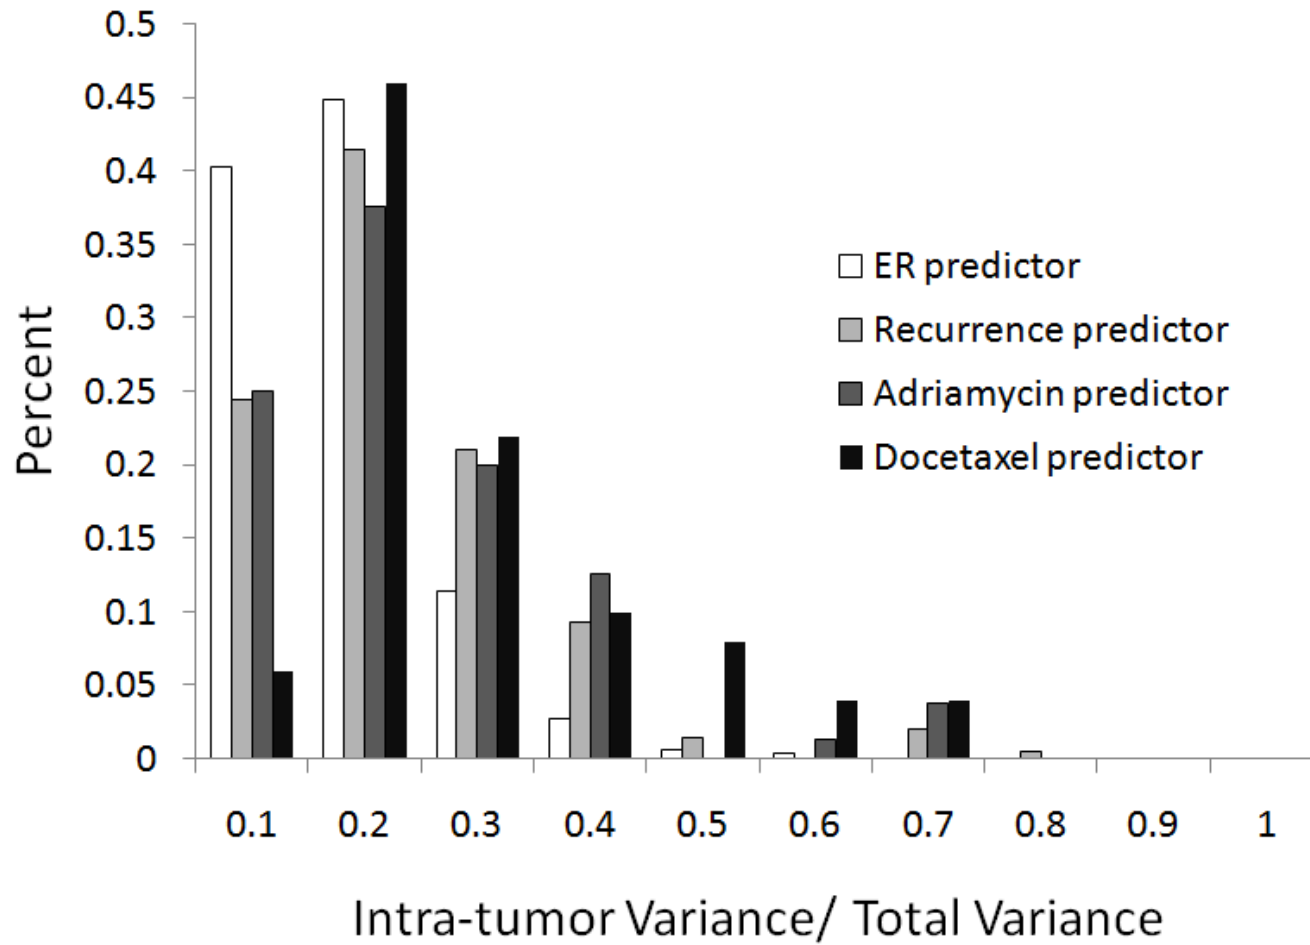

Barry et al. Supplemental Figure 2B

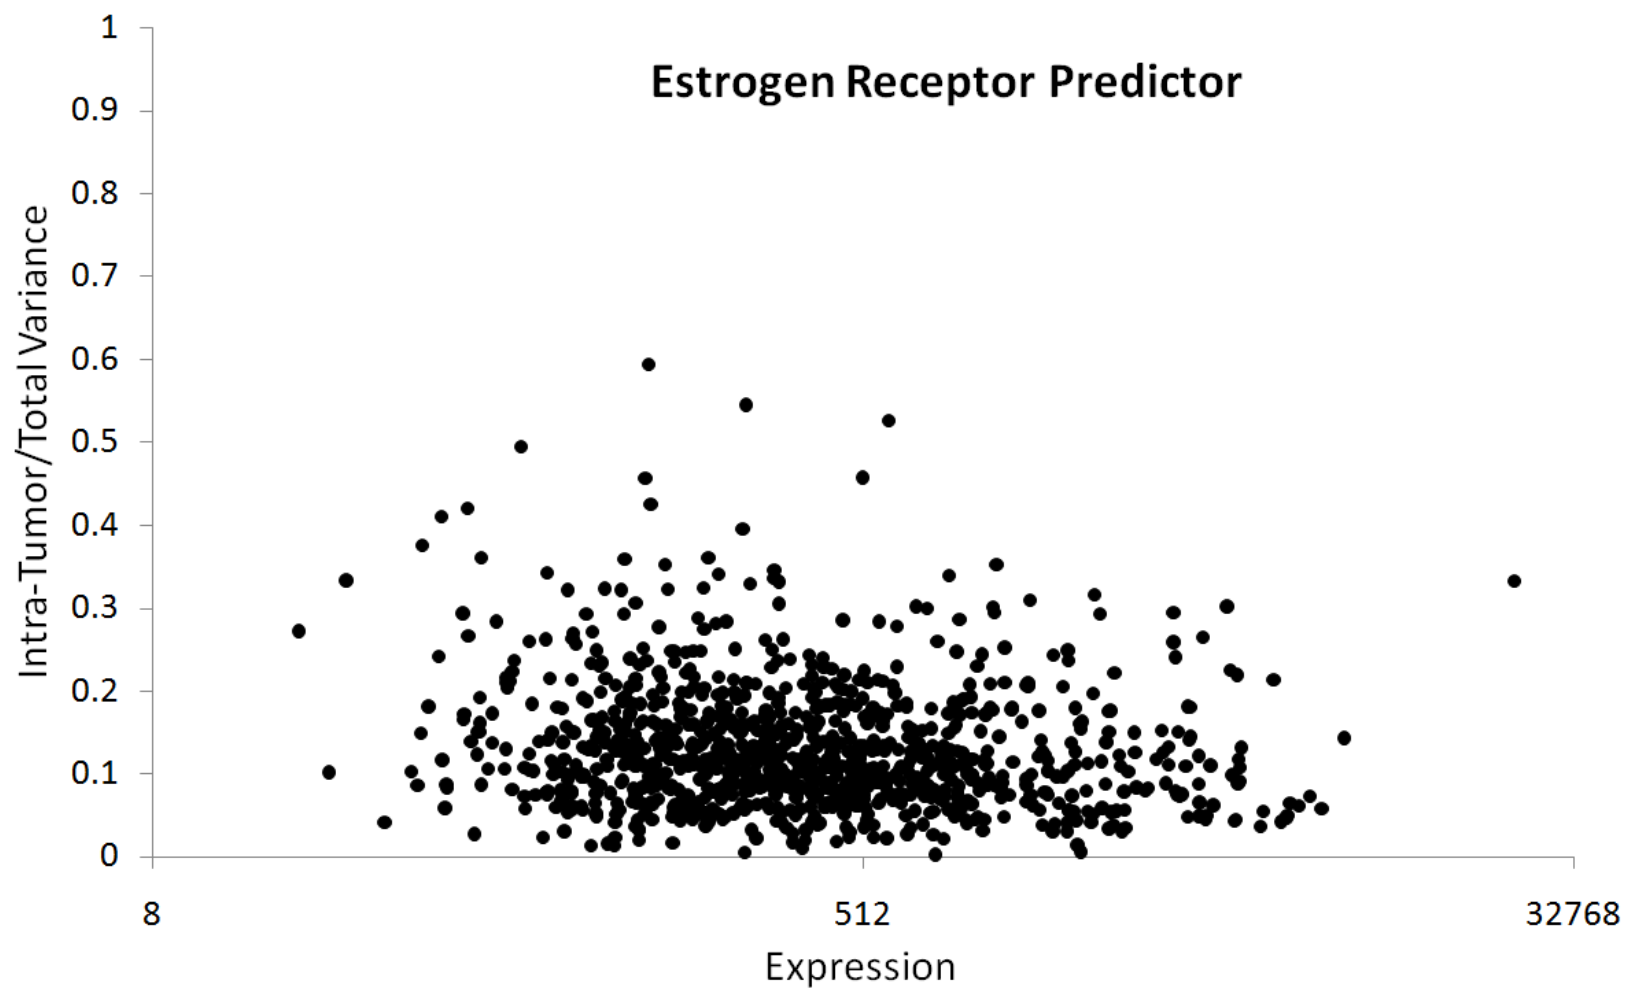

Barry et al. Supplemental Figure 2C

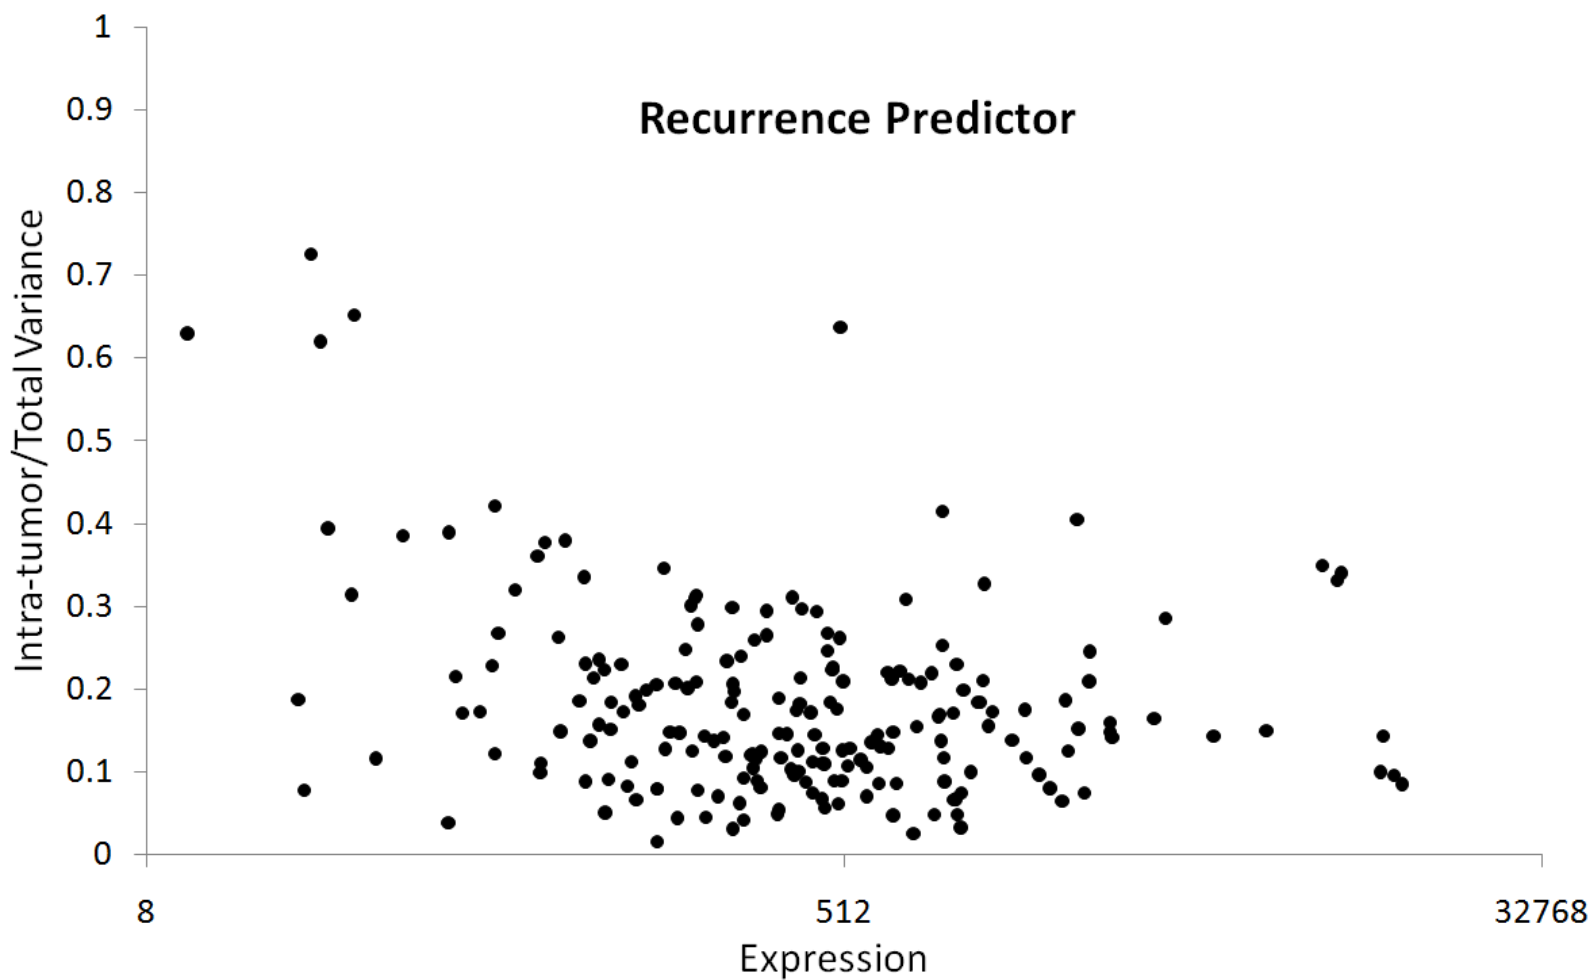

Barry et al. Supplemental Figure 2D

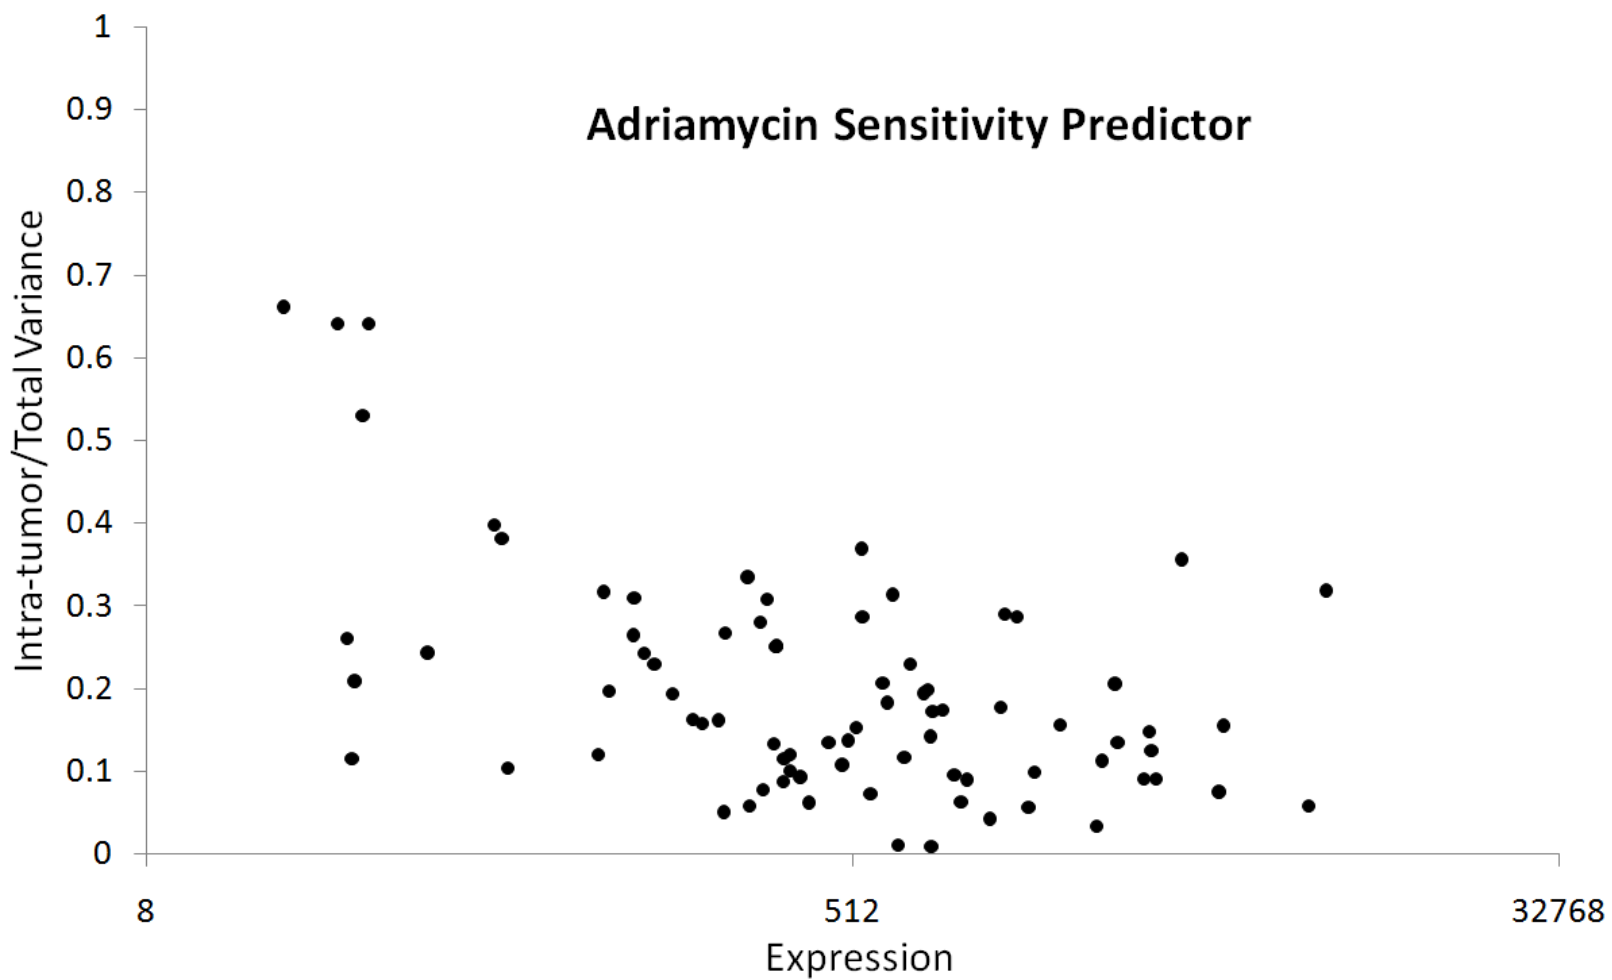

Barry et al. Supplemental Figure 2E

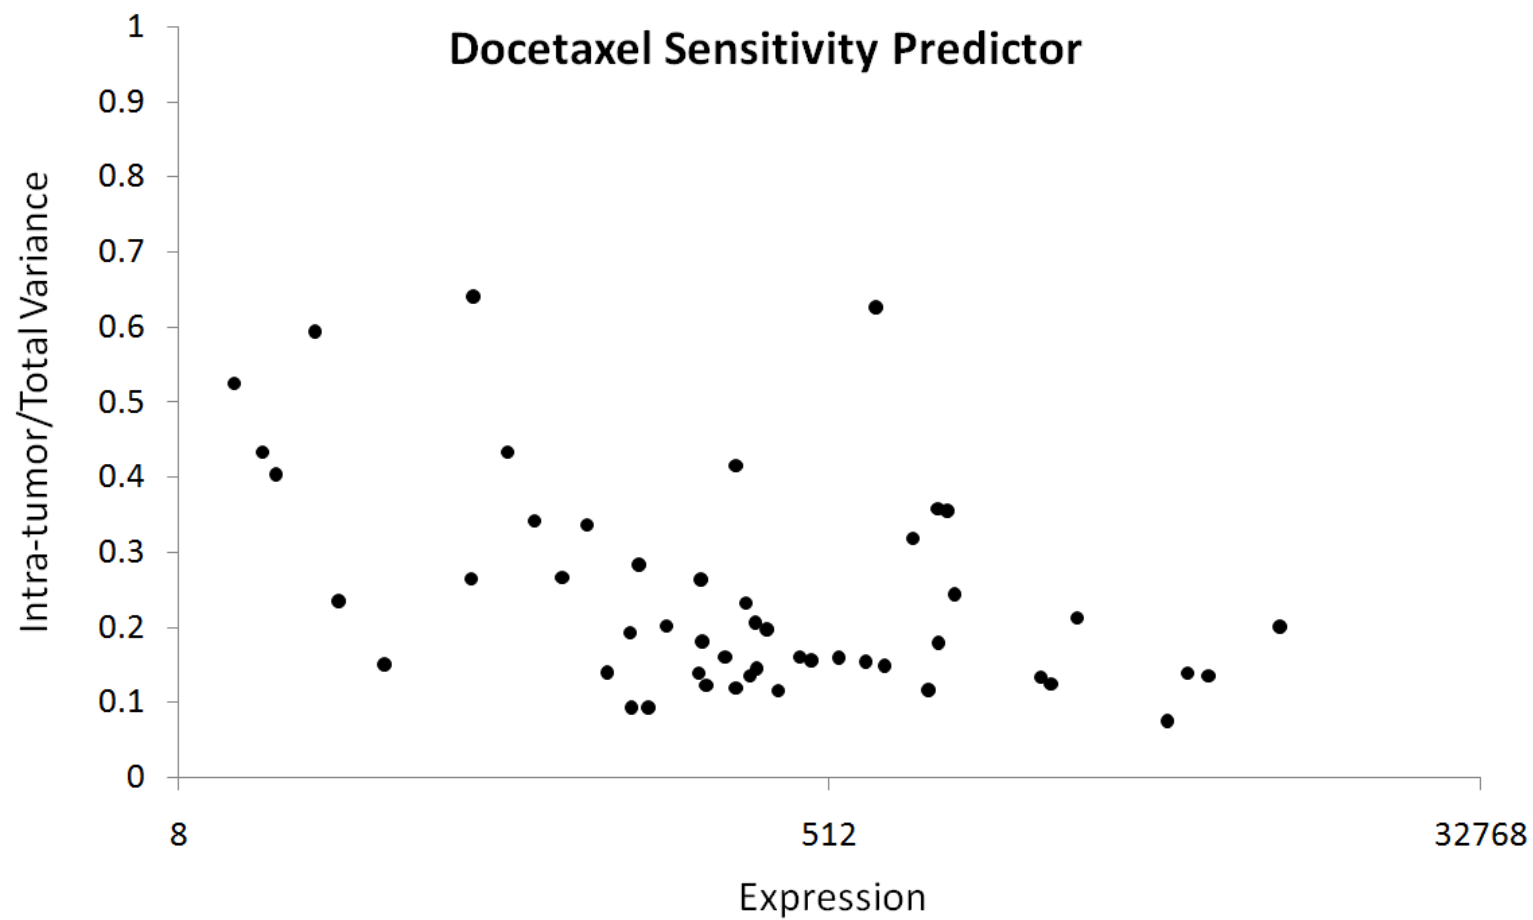



## Supplemental Tables

### Barry et al. Table S1

| <b>GSE3494 ER Predictor Gene List</b> |                    |                                                       |
|---------------------------------------|--------------------|-------------------------------------------------------|
| <b>Probe Set ID</b>                   | <b>Gene Symbol</b> | <b>Gene Title</b>                                     |
| 1053_at                               | RFC2               | replication factor C (activator 1) 2, 40kDa           |
| 200039_s_at                           | PSMB2              | proteasome (prosome, macropain) subunit, beta type, 2 |
| 200076_s_at                           | C19orf50           | chromosome 19 open reading frame 50                   |
| 200079_s_at                           | KARS               | lysyl-tRNA synthetase                                 |
| 200086_s_at                           | COX4I1             | cytochrome c oxidase subunit IV isoform 1             |
| 200628_s_at                           | WARS               | tryptophanyl-tRNA synthetase                          |
| 200629_at                             | WARS               | tryptophanyl-tRNA synthetase                          |
| 200670_at                             | XBP1               | X-box binding protein 1                               |
| 200687_s_at                           | SF3B3              | splicing factor 3b, subunit 3, 130kDa                 |
| 200711_s_at                           | SKP1               | S-phase kinase-associated protein 1                   |
| 200718_s_at                           | SKP1               | S-phase kinase-associated protein 1                   |
| 200719_at                             | SKP1               | S-phase kinase-associated protein 1                   |
| 200783_s_at                           | STMN1              | stathmin 1                                            |
| 200790_at                             | ODC1               | ornithine decarboxylase 1                             |
| 200794_x_at                           | DAZAP2             | DAZ associated protein 2                              |
| 200804_at                             | TMBIM6             | transmembrane BAX inhibitor motif containing 6        |
| 200810_s_at                           | CIRBP              | cold inducible RNA binding protein                    |
| 200811_at                             | CIRBP              | cold inducible RNA binding protein                    |
| 200875_s_at                           | NOP56              | NOP56 ribonucleoprotein homolog (yeast)               |
| 200934_at                             | DEK                | DEK oncogene                                          |
| 200979_at                             | PDHA1              | pyruvate dehydrogenase (lipoamide) alpha 1            |
| 200980_s_at                           | PDHA1              | pyruvate dehydrogenase (lipoamide) alpha 1            |
| 201030_x_at                           | LDHB               | lactate dehydrogenase B                               |
| 201037_at                             | PFKP               | phosphofructokinase, platelet                         |
| 201041_s_at                           | DUSP1              | dual specificity phosphatase 1                        |
| 201056_at                             | GOLGB1             | golgin B1, golgi integral membrane protein            |

|             |                       |                                                                                             |
|-------------|-----------------------|---------------------------------------------------------------------------------------------|
| 201057_s_at | GOLGB1                | golgin B1, golgi integral membrane protein                                                  |
| 201064_s_at | PABPC4                | poly(A) binding protein, cytoplasmic 4 (inducible form)                                     |
| 201068_s_at | PSMC2                 | proteasome (prosome, macropain) 26S subunit, ATPase, 2                                      |
| 201077_s_at | NHP2L1                | NHP2 non-histone chromosome protein 2-like 1 (S. cerevisiae)                                |
| 201088_at   | KPNA2                 | karyopherin alpha 2 (RAG cohort 1, importin alpha 1)                                        |
| 201124_at   | ITGB5                 | integrin, beta 5                                                                            |
| 201125_s_at | ITGB5                 | integrin, beta 5                                                                            |
| 201169_s_at | BHLHE40               | basic helix-loop-helix family, member e40                                                   |
| 201170_s_at | BHLHE40               | basic helix-loop-helix family, member e40                                                   |
| 201189_s_at | ITPR3                 | inositol 1,4,5-triphosphate receptor, type 3                                                |
| 201195_s_at | SLC7A5                | solute carrier family 7 (cationic amino acid transporter, y+ system), member 5              |
| 201196_s_at | AMD1                  | adenosylmethionine decarboxylase 1                                                          |
| 201197_at   | AMD1                  | adenosylmethionine decarboxylase 1                                                          |
| 201201_at   | CSTB                  | cystatin B (stefin B)                                                                       |
| 201202_at   | PCNA                  | proliferating cell nuclear antigen                                                          |
| 201231_s_at | ENO1                  | enolase 1, (alpha)                                                                          |
| 201236_s_at | BTG2                  | BTG family, member 2                                                                        |
| 201266_at   | TXNRD1                | thioredoxin reductase 1                                                                     |
| 201275_at   | FDPS                  | farnesyl diphosphate synthase (farnesyl pyrophosphate synthetase, dimethylallyltransferase) |
| 201276_at   | RAB5B                 | RAB5B, member RAS oncogene family                                                           |
| 201305_x_at | ANP32B                | acidic (leucine-rich) nuclear phosphoprotein 32 family, member B                            |
| 201306_s_at | ANP32B                | acidic (leucine-rich) nuclear phosphoprotein 32 family, member B                            |
| 201311_s_at | SH3BGRL               | SH3 domain binding glutamic acid-rich protein like                                          |
| 201327_s_at | CCT6A                 | chaperonin containing TCP1, subunit 6A (zeta 1)                                             |
| 201349_at   | SLC9A3R1              | solute carrier family 9 (sodium/hydrogen exchanger), member 3 regulator 1                   |
| 201360_at   | CST3                  | cystatin C                                                                                  |
| 201362_at   | IVNS1ABP              | influenza virus NS1A binding protein                                                        |
| 201383_s_at | LOC100133166 /// NBR1 | similar to neighbor of BRCA1 gene 1 /// neighbor of BRCA1 gene 1                            |
| 201384_s_at | LOC100133166 /// NBR1 | similar to neighbor of BRCA1 gene 1 /// neighbor of BRCA1 gene 1                            |
| 201394_s_at | RBM5                  | RNA binding motif protein 5                                                                 |
| 201395_at   | RBM5                  | RNA binding motif protein 5                                                                 |
| 201397_at   | PHGDH                 | phosphoglycerate dehydrogenase                                                              |
| 201412_at   | LRP10                 | low density lipoprotein receptor-related protein 10                                         |

|             |                  |                                                                                                             |
|-------------|------------------|-------------------------------------------------------------------------------------------------------------|
| 201455_s_at | NPEPPS           | aminopeptidase puromycin sensitive                                                                          |
| 201479_at   | DKC1             | dyskeratosis congenita 1, dyskerin                                                                          |
| 201487_at   | CTSC             | cathepsin C                                                                                                 |
| 201492_s_at | RPL41            | ribosomal protein L41                                                                                       |
| 201508_at   | IGFBP4           | insulin-like growth factor binding protein 4                                                                |
| 201516_at   | SRM              | spermidine synthase                                                                                         |
| 201584_s_at | DDX39            | DEAD (Asp-Glu-Ala-Asp) box polypeptide 39                                                                   |
| 201587_s_at | IRAK1            | interleukin-1 receptor-associated kinase 1                                                                  |
| 201591_s_at | NISCH            | nischarin                                                                                                   |
| 201596_x_at | KRT18            | keratin 18                                                                                                  |
| 201658_at   | ARL1             | ADP-ribosylation factor-like 1                                                                              |
| 201685_s_at | TOX4             | TOX high mobility group box family member 4                                                                 |
| 201710_at   | MYBL2            | v-myb myeloblastosis viral oncogene homolog (avian)-like 2                                                  |
| 201725_at   | CDC123           | cell division cycle 123 homolog (S. cerevisiae)                                                             |
| 201755_at   | MCM5             | minichromosome maintenance complex component 5                                                              |
| 201757_at   | NDUFS5 /// RPL10 | NADH dehydrogenase (ubiquinone) Fe-S protein 5, 15kDa (NADH-coenzyme Q reductase) /// ribosomal protein L10 |
| 201761_at   | MTHFD2           | methylenetetrahydrofolate dehydrogenase (NADP+ dependent) 2, methenyltetrahydrofolate cyclohydrolase        |
| 201770_at   | SNRPA            | small nuclear ribonucleoprotein polypeptide A                                                               |
| 201778_s_at | KIAA0494         | KIAA0494                                                                                                    |
| 201790_s_at | DHCR7            | 7-dehydrocholesterol reductase                                                                              |
| 201791_s_at | DHCR7            | 7-dehydrocholesterol reductase                                                                              |
| 201795_at   | LBR              | lamin B receptor                                                                                            |
| 201825_s_at | SCCPDH           | saccharopine dehydrogenase (putative)                                                                       |
| 201826_s_at | SCCPDH           | saccharopine dehydrogenase (putative)                                                                       |
| 201833_at   | HDAC2            | histone deacetylase 2                                                                                       |
| 201834_at   | PRKAB1           | protein kinase, AMP-activated, beta 1 non-catalytic subunit                                                 |
| 201835_s_at | PRKAB1           | protein kinase, AMP-activated, beta 1 non-catalytic subunit                                                 |
| 201841_s_at | HSPB1            | heat shock 27kDa protein 1                                                                                  |
| 201853_s_at | CDC25B           | cell division cycle 25 homolog B (S. pombe)                                                                 |
| 201860_s_at | PLAT             | plasminogen activator, tissue                                                                               |
| 201886_at   | WDR23            | WD repeat domain 23                                                                                         |
| 201890_at   | RRM2             | ribonucleotide reductase M2 polypeptide                                                                     |
| 201914_s_at | SEC63            | SEC63 homolog (S. cerevisiae)                                                                               |

|             |            |                                                                                     |
|-------------|------------|-------------------------------------------------------------------------------------|
| 201916_s_at | SEC63      | SEC63 homolog (S. cerevisiae)                                                       |
| 201930_at   | MCM6       | minichromosome maintenance complex component 6                                      |
| 201938_at   | CDK2AP1    | cyclin-dependent kinase 2 associated protein 1                                      |
| 201948_at   | GNL2       | guanine nucleotide binding protein-like 2 (nucleolar)                               |
| 201970_s_at | NASP       | nuclear autoantigenic sperm protein (histone-binding)                               |
| 201976_s_at | MYO10      | myosin X                                                                            |
| 202001_s_at | NDUFA6     | NADH dehydrogenase (ubiquinone) 1 alpha subcomplex, 6, 14kDa                        |
| 202005_at   | ST14       | suppression of tumorigenicity 14 (colon carcinoma)                                  |
| 202080_s_at | TRAK1      | trafficking protein, kinesin binding 1                                              |
| 202088_at   | SLC39A6    | solute carrier family 39 (zinc transporter), member 6                               |
| 202089_s_at | SLC39A6    | solute carrier family 39 (zinc transporter), member 6                               |
| 202094_at   | BIRC5      | baculoviral IAP repeat-containing 5                                                 |
| 202095_s_at | BIRC5      | baculoviral IAP repeat-containing 5                                                 |
| 202110_at   | COX7B      | cytochrome c oxidase subunit VIIb                                                   |
| 202146_at   | IFRD1      | interferon-related developmental regulator 1                                        |
| 202147_s_at | IFRD1      | interferon-related developmental regulator 1                                        |
| 202188_at   | NUP93      | nucleoporin 93kDa                                                                   |
| 202200_s_at | SRPK1      | SFRS protein kinase 1                                                               |
| 202204_s_at | AMFR       | autocrine motility factor receptor                                                  |
| 202208_s_at | ARL4C      | ADP-ribosylation factor-like 4C                                                     |
| 202233_s_at | UQCRH      | ubiquinol-cytochrome c reductase hinge protein                                      |
| 202240_at   | PLK1       | polo-like kinase 1 (Drosophila)                                                     |
| 202268_s_at | NAE1       | NEDD8 activating enzyme E1 subunit 1                                                |
| 202269_x_at | GBP1       | guanylate binding protein 1, interferon-inducible, 67kDa                            |
| 202270_at   | GBP1       | guanylate binding protein 1, interferon-inducible, 67kDa                            |
| 202276_at   | SHFM1      | split hand/foot malformation (ectrodactyly) type 1                                  |
| 202307_s_at | TAP1       | transporter 1, ATP-binding cassette, sub-family B (MDR/TAP)                         |
| 202329_at   | CSK        | c-src tyrosine kinase                                                               |
| 202338_at   | TK1        | thymidine kinase 1, soluble                                                         |
| 202357_s_at | C2 /// CFB | complement component 2 /// complement factor B                                      |
| 202370_s_at | CBFB       | core-binding factor, beta subunit                                                   |
| 202371_at   | TCEAL4     | transcription elongation factor A (SII)-like 4                                      |
| 202376_at   | SERPINA3   | serpin peptidase inhibitor, clade A (alpha-1 antiproteinase, antitrypsin), member 3 |

|             |                     |                                                                                      |
|-------------|---------------------|--------------------------------------------------------------------------------------|
| 202409_at   | IGF2 /// INS-IGF2   | insulin-like growth factor 2 (somatomedin A) /// INS-IGF2 readthrough transcript     |
| 202412_s_at | USP1                | ubiquitin specific peptidase 1                                                       |
| 202454_s_at | ERBB3               | v-erb-b2 erythroblastic leukemia viral oncogene homolog 3 (avian)                    |
| 202466_at   | POLS                | polymerase (DNA directed) sigma                                                      |
| 202483_s_at | RANBP1              | RAN binding protein 1                                                                |
| 202494_at   | PPIE                | peptidylprolyl isomerase E (cyclophilin E)                                           |
| 202501_at   | MAPRE2              | microtubule-associated protein, RP/EB family, member 2                               |
| 202511_s_at | ATG5                | ATG5 autophagy related 5 homolog (S. cerevisiae)                                     |
| 202554_s_at | GSTM3               | glutathione S-transferase mu 3 (brain)                                               |
| 202580_x_at | FOXM1               | forkhead box M1                                                                      |
| 202589_at   | TYMS                | thymidylate synthetase                                                               |
| 202599_s_at | NRIP1               | nuclear receptor interacting protein 1                                               |
| 202613_at   | CTPS                | CTP synthase                                                                         |
| 202622_s_at | ATXN2               | ataxin 2                                                                             |
| 202623_at   | EAPP                | E2F-associated phosphoprotein                                                        |
| 202625_at   | LYN                 | v-yes-1 Yamaguchi sarcoma viral related oncogene homolog                             |
| 202641_at   | ARL3                | ADP-ribosylation factor-like 3                                                       |
| 202679_at   | NPC1                | Niemann-Pick disease, type C1                                                        |
| 202698_x_at | COX4I1              | cytochrome c oxidase subunit IV isoform 1                                            |
| 202705_at   | CCNB2               | cyclin B2                                                                            |
| 202718_at   | IGFBP2              | insulin-like growth factor binding protein 2, 36kDa                                  |
| 202719_s_at | TES                 | testis derived transcript (3 LIM domains)                                            |
| 202720_at   | TES                 | testis derived transcript (3 LIM domains)                                            |
| 202735_at   | EBP                 | emopamil binding protein (sterol isomerase)                                          |
| 202752_x_at | SLC7A8              | solute carrier family 7 (cationic amino acid transporter, y+ system), member 8       |
| 202754_at   | R3HDM1              | R3H domain containing 1                                                              |
| 202756_s_at | GPC1                | glypican 1                                                                           |
| 202772_at   | HMGCL               | 3-hydroxymethyl-3-methylglutaryl-Coenzyme A lyase                                    |
| 202776_at   | DNTTIP2             | deoxynucleotidyltransferase, terminal, interacting protein 2                         |
| 202779_s_at | LOC731049 /// UBE2S | similar to Ubiquitin-conjugating enzyme E2S (Ubiquitin-conjugating enzyme E2-24 kDa) |
| 202808_at   | C10orf26            | chromosome 10 open reading frame 26                                                  |
| 202814_s_at | HEXIM1              | hexamethylene bis-acetamide inducible 1                                              |
| 202815_s_at | HEXIM1              | hexamethylene bis-acetamide inducible 1                                              |

|             |                 |                                                                                        |
|-------------|-----------------|----------------------------------------------------------------------------------------|
| 202819_s_at | TCEB3           | transcription elongation factor B (SIII), polypeptide 3 (110kDa, elongin A)            |
| 202858_at   | U2AF1           | U2 small nuclear RNA auxiliary factor 1                                                |
| 202870_s_at | CDC20           | cell division cycle 20 homolog (S. cerevisiae)                                         |
| 202896_s_at | SIRPA           | signal-regulatory protein alpha                                                        |
| 202908_at   | WFS1            | Wolfram syndrome 1 (wolframin)                                                         |
| 202917_s_at | S100A8          | S100 calcium binding protein A8                                                        |
| 202932_at   | YES1            | v-yes-1 Yamaguchi sarcoma viral oncogene homolog 1                                     |
| 202933_s_at | YES1            | v-yes-1 Yamaguchi sarcoma viral oncogene homolog 1                                     |
| 202951_at   | STK38           | serine/threonine kinase 38                                                             |
| 202954_at   | UBE2C           | ubiquitin-conjugating enzyme E2C                                                       |
| 202961_s_at | ATP5J2          | ATP synthase, H <sup>+</sup> transporting, mitochondrial F0 complex, subunit F2        |
| 202982_s_at | ACOT1 /// ACOT2 | acyl-CoA thioesterase 1 /// acyl-CoA thioesterase 2                                    |
| 202996_at   | POLD4           | polymerase (DNA-directed), delta 4                                                     |
| 203009_at   | BCAM            | basal cell adhesion molecule (Lutheran blood group)                                    |
| 203045_at   | NINJ1           | ninjurin 1                                                                             |
| 203050_at   | TP53BP1         | tumor protein p53 binding protein 1                                                    |
| 203066_at   | GALNAC4S-6ST    | B cell RAG associated protein                                                          |
| 203071_at   | SEMA3B          | sema domain, immunoglobulin domain (Ig), short basic domain, secreted, (semaphorin) 3B |
| 203073_at   | COG2            | component of oligomeric golgi complex 2                                                |
| 203120_at   | TP53BP2         | tumor protein p53 binding protein, 2                                                   |
| 203139_at   | DAPK1           | death-associated protein kinase 1                                                      |
| 203143_s_at | KIAA0040        | KIAA0040                                                                               |
| 203144_s_at | KIAA0040        | KIAA0040                                                                               |
| 203149_at   | PVRL2           | poliovirus receptor-related 2 (herpesvirus entry mediator B)                           |
| 203173_s_at | C16orf62        | chromosome 16 open reading frame 62                                                    |
| 203187_at   | DOCK1           | dedicator of cytokinesis 1                                                             |
| 203226_s_at | TSPAN31         | tetraspanin 31                                                                         |
| 203234_at   | UPP1            | uridine phosphorylase 1                                                                |
| 203246_s_at | TUSC4           | tumor suppressor candidate 4                                                           |
| 203263_s_at | ARHGEF9         | Cdc42 guanine nucleotide exchange factor (GEF) 9                                       |
| 203276_at   | LMNB1           | lamin B1                                                                               |
| 203283_s_at | HS2ST1          | heparan sulfate 2-O-sulfotransferase 1                                                 |
| 203287_at   | LAD1            | ladinin 1                                                                              |

|             |           |                                                                                                |
|-------------|-----------|------------------------------------------------------------------------------------------------|
| 203315_at   | NCK2      | NCK adaptor protein 2                                                                          |
| 203358_s_at | EZH2      | enhancer of zeste homolog 2 (Drosophila)                                                       |
| 203362_s_at | MAD2L1    | MAD2 mitotic arrest deficient-like 1 (yeast)                                                   |
| 203396_at   | PSMA4     | proteasome (prosome, macropain) subunit, alpha type, 4                                         |
| 203397_s_at | GALNT3    | UDP-N-acetyl-alpha-D-galactosamine:polypeptide N-acetylgalactosaminyltransferase 3 (GalNAc-T3) |
| 203405_at   | PSMG1     | proteasome (prosome, macropain) assembly chaperone 1                                           |
| 203418_at   | CCNA2     | cyclin A2                                                                                      |
| 203422_at   | POLD1     | polymerase (DNA directed), delta 1, catalytic subunit 125kDa                                   |
| 203428_s_at | ASF1A     | ASF1 anti-silencing function 1 homolog A (S. cerevisiae)                                       |
| 203430_at   | HEBP2     | heme binding protein 2                                                                         |
| 203438_at   | STC2      | stanniocalcin 2                                                                                |
| 203439_s_at | STC2      | stanniocalcin 2                                                                                |
| 203453_at   | SCNN1A    | sodium channel, nonvoltage-gated 1 alpha                                                       |
| 203455_s_at | SAT1      | spermidine/spermine N1-acetyltransferase 1                                                     |
| 203476_at   | TPBG      | trophoblast glycoprotein                                                                       |
| 203513_at   | SPG11     | spastic paraplegia 11 (autosomal recessive)                                                    |
| 203538_at   | CAMLG     | calcium modulating ligand                                                                      |
| 203554_x_at | PTTG1     | pituitary tumor-transforming 1                                                                 |
| 203571_s_at | C10orf116 | chromosome 10 open reading frame 116                                                           |
| 203604_at   | ZNF516    | zinc finger protein 516                                                                        |
| 203614_at   | UTP14C    | UTP14, U3 small nucleolar ribonucleoprotein, homolog C (yeast)                                 |
| 203627_at   | IGF1R     | insulin-like growth factor 1 receptor                                                          |
| 203628_at   | IGF1R     | insulin-like growth factor 1 receptor                                                          |
| 203647_s_at | FDX1      | ferredoxin 1                                                                                   |
| 203657_s_at | CTSF      | cathepsin F                                                                                    |
| 203663_s_at | COX5A     | cytochrome c oxidase subunit Va                                                                |
| 203682_s_at | IVD       | isovaleryl Coenzyme A dehydrogenase                                                            |
| 203685_at   | BCL2      | B-cell CLL/lymphoma 2                                                                          |
| 203692_s_at | E2F3      | E2F transcription factor 3                                                                     |
| 203693_s_at | E2F3      | E2F transcription factor 3                                                                     |
| 203696_s_at | RFC2      | replication factor C (activator 1) 2, 40kDa                                                    |
| 203702_s_at | TTL4      | tubulin tyrosine ligase-like family, member 4                                                  |
| 203710_at   | ITPR1     | inositol 1,4,5-triphosphate receptor, type 1                                                   |

|             |               |                                                                                       |
|-------------|---------------|---------------------------------------------------------------------------------------|
| 203712_at   | KIAA0020      | KIAA0020                                                                              |
| 203740_at   | MPHOSPH6      | M-phase phosphoprotein 6                                                              |
| 203749_s_at | RARA          | retinoic acid receptor, alpha                                                         |
| 203755_at   | BUB1B         | budding uninhibited by benzimidazoles 1 homolog beta (yeast)                          |
| 203756_at   | ARHGEF17      | Rho guanine nucleotide exchange factor (GEF) 17                                       |
| 203764_at   | DLGAP5        | discs, large (Drosophila) homolog-associated protein 5                                |
| 203775_at   | SLC25A13      | solute carrier family 25, member 13 (citrin)                                          |
| 203805_s_at | FANCA         | Fanconi anemia, complementation group A                                               |
| 203806_s_at | FANCA         | Fanconi anemia, complementation group A                                               |
| 203828_s_at | IL32          | interleukin 32                                                                        |
| 203834_s_at | TGOLN2        | trans-golgi network protein 2                                                         |
| 203856_at   | VRK1          | vaccinia related kinase 1                                                             |
| 203859_s_at | PALM          | paralemmin                                                                            |
| 203896_s_at | PLCB4         | phospholipase C, beta 4                                                               |
| 203921_at   | CHST2         | carbohydrate (N-acetylglucosamine-6-O) sulfotransferase 2                             |
| 203927_at   | NFKBIE        | nuclear factor of kappa light polypeptide gene enhancer in B-cells inhibitor, epsilon |
| 203928_x_at | MAPT          | microtubule-associated protein tau                                                    |
| 203929_s_at | MAPT          | microtubule-associated protein tau                                                    |
| 203930_s_at | MAPT          | microtubule-associated protein tau                                                    |
| 203956_at   | MORC2         | MORC family CW-type zinc finger 2                                                     |
| 203961_at   | NEBL          | nebulette                                                                             |
| 203962_s_at | NEBL          | nebulette                                                                             |
| 203963_at   | CA12          | carbonic anhydrase XII                                                                |
| 203964_at   | NMI           | N-myc (and STAT) interactor                                                           |
| 203975_s_at | CHAF1A        | chromatin assembly factor 1, subunit A (p150)                                         |
| 203988_s_at | FUT8          | fucosyltransferase 8 (alpha (1,6) fucosyltransferase)                                 |
| 204023_at   | RFC4          | replication factor C (activator 1) 4, 37kDa                                           |
| 204029_at   | CELSR2        | cadherin, EGF LAG seven-pass G-type receptor 2 (flamingo homolog, Drosophila)         |
| 204033_at   | TRIP13        | thyroid hormone receptor interactor 13                                                |
| 204045_at   | TCEAL1        | transcription elongation factor A (SII)-like 1                                        |
| 204059_s_at | ME1           | malic enzyme 1, NADP(+)-dependent, cytosolic                                          |
| 204060_s_at | PRKX /// PRKY | protein kinase, X-linked /// protein kinase, Y-linked                                 |
| 204061_at   | PRKX          | protein kinase, X-linked                                                              |



|             |          |                                                                                           |
|-------------|----------|-------------------------------------------------------------------------------------------|
| 204067_at   | SUOX     | sulfite oxidase                                                                           |
| 204072_s_at | FRY      | furry homolog (Drosophila)                                                                |
| 204088_at   | P2RX4    | purinergic receptor P2X, ligand-gated ion channel, 4                                      |
| 204092_s_at | AURKA    | aurora kinase A                                                                           |
| 204117_at   | PREP     | prolyl endopeptidase                                                                      |
| 204126_s_at | CDC45L   | CDC45 cell division cycle 45-like (S. cerevisiae)                                         |
| 204127_at   | RFC3     | replication factor C (activator 1) 3, 38kDa                                               |
| 204139_x_at | MZF1     | myeloid zinc finger 1                                                                     |
| 204146_at   | RAD51AP1 | RAD51 associated protein 1                                                                |
| 204162_at   | NDC80    | NDC80 homolog, kinetochore complex component (S. cerevisiae)                              |
| 204165_at   | WASF1    | WAS protein family, member 1                                                              |
| 204170_s_at | CKS2     | CDC28 protein kinase regulatory subunit 2                                                 |
| 204197_s_at | RUNX3    | runt-related transcription factor 3                                                       |
| 204198_s_at | RUNX3    | runt-related transcription factor 3                                                       |
| 204203_at   | CEBPG    | CCAAT/enhancer binding protein (C/EBP), gamma                                             |
| 204217_s_at | RTN2     | reticulon 2                                                                               |
| 204228_at   | PPIH     | peptidylprolyl isomerase H (cyclophilin H)                                                |
| 204231_s_at | FAAH     | fatty acid amide hydrolase                                                                |
| 204244_s_at | DBF4     | DBF4 homolog (S. cerevisiae)                                                              |
| 204259_at   | MMP7     | matrix metalloproteinase 7 (matrilysin, uterine)                                          |
| 204304_s_at | PROM1    | prominin 1                                                                                |
| 204315_s_at | GTSE1    | G-2 and S-phase expressed 1                                                               |
| 204318_s_at | GTSE1    | G-2 and S-phase expressed 1                                                               |
| 204343_at   | ABCA3    | ATP-binding cassette, sub-family A (ABC1), member 3                                       |
| 204372_s_at | KHSRP    | KH-type splicing regulatory protein                                                       |
| 204398_s_at | EML2     | echinoderm microtubule associated protein like 2                                          |
| 204401_at   | KCNN4    | potassium intermediate/small conductance calcium-activated channel, subfamily N, member 4 |
| 204430_s_at | SLC2A5   | solute carrier family 2 (facilitated glucose/fructose transporter), member 5              |
| 204444_at   | KIF11    | kinesin family member 11                                                                  |
| 204470_at   | CXCL1    | chemokine (C-X-C motif) ligand 1 (melanoma growth stimulating activity, alpha)            |
| 204475_at   | MMP1     | matrix metalloproteinase 1 (interstitial collagenase)                                     |
| 204495_s_at | C15orf39 | chromosome 15 open reading frame 39                                                       |
| 204497_at   | ADCY9    | adenylate cyclase 9                                                                       |

|             |                   |                                                                                                      |
|-------------|-------------------|------------------------------------------------------------------------------------------------------|
| 204500_s_at | AGTPBP1           | ATP/GTP binding protein 1                                                                            |
| 204508_s_at | CA12              | carbonic anhydrase XII                                                                               |
| 204510_at   | CDC7              | cell division cycle 7 homolog (S. cerevisiae)                                                        |
| 204514_at   | DPH2              | DPH2 homolog (S. cerevisiae)                                                                         |
| 204533_at   | CXCL10            | chemokine (C-X-C motif) ligand 10                                                                    |
| 204541_at   | SEC14L2           | SEC14-like 2 (S. cerevisiae)                                                                         |
| 204558_at   | RAD54L            | RAD54-like (S. cerevisiae)                                                                           |
| 204568_at   | KIAA0831          | KIAA0831                                                                                             |
| 204593_s_at | SMCR7L            | Smith-Magenis syndrome chromosome region, candidate 7-like                                           |
| 204603_at   | EXO1              | exonuclease 1                                                                                        |
| 204605_at   | CGRRF1            | cell growth regulator with ring finger domain 1                                                      |
| 204613_at   | PLCG2             | phospholipase C, gamma 2 (phosphatidylinositol-specific)                                             |
| 204623_at   | TFF3              | trefoil factor 3 (intestinal)                                                                        |
| 204649_at   | TROAP             | trophinin associated protein (tastin)                                                                |
| 204667_at   | FOXA1             | forkhead box A1                                                                                      |
| 204675_at   | SRD5A1            | steroid-5-alpha-reductase, alpha polypeptide 1 (3-oxo-5 alpha-steroid delta 4-dehydrogenase alpha 1) |
| 204686_at   | IRS1              | insulin receptor substrate 1                                                                         |
| 204695_at   | CDC25A            | cell division cycle 25 homolog A (S. pombe)                                                          |
| 204702_s_at | NFE2L3            | nuclear factor (erythroid-derived 2)-like 3                                                          |
| 204703_at   | IFT88             | intraflagellar transport 88 homolog (Chlamydomonas)                                                  |
| 204735_at   | PDE4A             | phosphodiesterase 4A, cAMP-specific (phosphodiesterase E2 dunce homolog, Drosophila)                 |
| 204766_s_at | NUDT1             | nudix (nucleoside diphosphate linked moiety X)-type motif 1                                          |
| 204767_s_at | FEN1              | flap structure-specific endonuclease 1                                                               |
| 204769_s_at | TAP2              | transporter 2, ATP-binding cassette, sub-family B (MDR/TAP)                                          |
| 204775_at   | CHAF1B            | chromatin assembly factor 1, subunit B (p60)                                                         |
| 204785_x_at | IFNAR2            | interferon (alpha, beta and omega) receptor 2                                                        |
| 204786_s_at | IFNAR2            | interferon (alpha, beta and omega) receptor 2                                                        |
| 204798_at   | MYB               | v-myb myeloblastosis viral oncogene homolog (avian)                                                  |
| 204820_s_at | BTN3A2 /// BTN3A3 | butyrophilin, subfamily 3, member A2 /// butyrophilin, subfamily 3, member A3                        |
| 204822_at   | TTK               | TTK protein kinase                                                                                   |
| 204825_at   | MELK              | maternal embryonic leucine zipper kinase                                                             |
| 204837_at   | MTMR9             | myotubularin related protein 9                                                                       |
| 204862_s_at | NME3              | non-metastatic cells 3, protein expressed in                                                         |

|             |         |                                                                           |
|-------------|---------|---------------------------------------------------------------------------|
| 204863_s_at | IL6ST   | interleukin 6 signal transducer (gp130, oncostatin M receptor)            |
| 204881_s_at | UGCG    | UDP-glucose ceramide glucosyltransferase                                  |
| 204887_s_at | PLK4    | polo-like kinase 4 (Drosophila)                                           |
| 204913_s_at | SOX11   | SRY (sex determining region Y)-box 11                                     |
| 204914_s_at | SOX11   | SRY (sex determining region Y)-box 11                                     |
| 204915_s_at | SOX11   | SRY (sex determining region Y)-box 11                                     |
| 204934_s_at | HPN     | hepsin                                                                    |
| 204947_at   | E2F1    | E2F transcription factor 1                                                |
| 204962_s_at | CENPA   | centromere protein A                                                      |
| 204966_at   | BAI2    | brain-specific angiogenesis inhibitor 2                                   |
| 204975_at   | EMP2    | epithelial membrane protein 2                                             |
| 205008_s_at | CIB2    | calcium and integrin binding family member 2                              |
| 205009_at   | TFF1    | trefoil factor 1                                                          |
| 205016_at   | TGFA    | transforming growth factor, alpha                                         |
| 205024_s_at | RAD51   | RAD51 homolog (RecA homolog, E. coli) (S. cerevisiae)                     |
| 205030_at   | FABP7   | fatty acid binding protein 7, brain                                       |
| 205034_at   | CCNE2   | cyclin E2                                                                 |
| 205046_at   | CENPE   | centromere protein E, 312kDa                                              |
| 205057_s_at | IDUA    | iduronidase, alpha-L-                                                     |
| 205059_s_at | IDUA    | iduronidase, alpha-L-                                                     |
| 205066_s_at | ENPP1   | ectonucleotide pyrophosphatase/phosphodiesterase 1                        |
| 205074_at   | SLC22A5 | solute carrier family 22 (organic cation/carnitine transporter), member 5 |
| 205081_at   | CRIP1   | cysteine-rich protein 1 (intestinal)                                      |
| 205109_s_at | ARHGEF4 | Rho guanine nucleotide exchange factor (GEF) 4                            |
| 205141_at   | ANG     | angiogenin, ribonuclease, RNase A family, 5                               |
| 205158_at   | RNASE4  | ribonuclease, RNase A family, 4                                           |
| 205160_at   | PEX11A  | Peroxisomal biogenesis factor 11 alpha                                    |
| 205186_at   | DNALI1  | dynein, axonemal, light intermediate chain 1                              |
| 205201_at   | GLI3    | GLI family zinc finger 3                                                  |
| 205214_at   | STK17B  | serine/threonine kinase 17b                                               |
| 205240_at   | GPSM2   | G-protein signaling modulator 2 (AGS3-like, C. elegans)                   |
| 205339_at   | STIL    | SCL/TAL1 interrupting locus                                               |
| 205347_s_at | TMSB15A | thymosin beta 15a                                                         |

|             |         |                                                                                          |
|-------------|---------|------------------------------------------------------------------------------------------|
| 205354_at   | GAMT    | guanidinoacetate N-methyltransferase                                                     |
| 205363_at   | BBOX1   | butyrobetaine (gamma), 2-oxoglutarate dioxygenase (gamma-butyrobetaine hydroxylase) 1    |
| 205376_at   | INPP4B  | inositol polyphosphate-4-phosphatase, type II, 105kDa                                    |
| 205379_at   | CBR3    | carbonyl reductase 3                                                                     |
| 205380_at   | PDZK1   | PDZ domain containing 1                                                                  |
| 205381_at   | LRRC17  | leucine rich repeat containing 17                                                        |
| 205395_s_at | MRE11A  | MRE11 meiotic recombination 11 homolog A ( <i>S. cerevisiae</i> )                        |
| 205403_at   | IL1R2   | interleukin 1 receptor, type II                                                          |
| 205436_s_at | H2AFX   | H2A histone family, member X                                                             |
| 205447_s_at | MAP3K12 | mitogen-activated protein kinase kinase kinase 12                                        |
| 205448_s_at | MAP3K12 | mitogen-activated protein kinase kinase kinase 12                                        |
| 205471_s_at | DACH1   | dachshund homolog 1 ( <i>Drosophila</i> )                                                |
| 205487_s_at | VGLL1   | vestigial like 1 ( <i>Drosophila</i> )                                                   |
| 205495_s_at | GNLY    | granulysin                                                                               |
| 205548_s_at | BTG3    | BTG family, member 3                                                                     |
| 205569_at   | LAMP3   | lysosomal-associated membrane protein 3                                                  |
| 205593_s_at | PDE9A   | phosphodiesterase 9A                                                                     |
| 205596_s_at | SMURF2  | SMAD specific E3 ubiquitin protein ligase 2                                              |
| 205597_at   | SLC44A4 | solute carrier family 44, member 4                                                       |
| 205613_at   | SYT17   | synaptotagmin XVII                                                                       |
| 205617_at   | PRRG2   | proline rich Gla (G-carboxyglutamic acid) 2                                              |
| 205644_s_at | SNRPG   | small nuclear ribonucleoprotein polypeptide G                                            |
| 205646_s_at | PAX6    | paired box 6                                                                             |
| 205671_s_at | HLA-DOB | major histocompatibility complex, class II, DO beta                                      |
| 205683_x_at | TPSAB1  | tryptase alpha/beta 1                                                                    |
| 205696_s_at | GFRA1   | GDNF family receptor alpha 1                                                             |
| 205711_x_at | ATP5C1  | ATP synthase, H <sup>+</sup> transporting, mitochondrial F1 complex, gamma polypeptide 1 |
| 205714_s_at | ZMYND10 | zinc finger, MYND-type containing 10                                                     |
| 205730_s_at | ABLIM3  | actin binding LIM protein family, member 3                                               |
| 205733_at   | BLM     | Bloom syndrome, RecQ helicase-like                                                       |
| 205734_s_at | AFF3    | AF4/FMR2 family, member 3                                                                |
| 205735_s_at | AFF3    | AF4/FMR2 family, member 3                                                                |
| 205776_at   | FMO5    | flavin containing monooxygenase 5                                                        |

|             |                          |                                                                                           |
|-------------|--------------------------|-------------------------------------------------------------------------------------------|
| 205794_s_at | NOVA1                    | neuro-oncological ventral antigen 1                                                       |
| 205819_at   | MARCO                    | macrophage receptor with collagenous structure                                            |
| 205860_x_at | FOLH1                    | folate hydrolase (prostate-specific membrane antigen) 1                                   |
| 205862_at   | GREB1                    | GREB1 protein                                                                             |
| 205917_at   | ZNF264                   | zinc finger protein 264                                                                   |
| 205936_s_at | HK3                      | hexokinase 3 (white cell)                                                                 |
| 205943_at   | TDO2                     | tryptophan 2,3-dioxygenase                                                                |
| 205948_at   | PTPRT                    | protein tyrosine phosphatase, receptor type, T                                            |
| 205967_at   | HIST1H4C                 | histone cluster 1, H4c                                                                    |
| 206023_at   | NMU                      | neuromedin U                                                                              |
| 206055_s_at | SNRPA1                   | small nuclear ribonucleoprotein polypeptide A'                                            |
| 206060_s_at | PTPN22                   | protein tyrosine phosphatase, non-receptor type 22 (lymphoid)                             |
| 206074_s_at | HMGA1                    | high mobility group AT-hook 1                                                             |
| 206081_at   | SLC24A1                  | solute carrier family 24 (sodium/potassium/calcium exchanger), member 1                   |
| 206102_at   | GINS1                    | GINS complex subunit 1 (Psf1 homolog)                                                     |
| 206134_at   | ADAMDEC1                 | ADAM-like, decysin 1                                                                      |
| 206197_at   | NME5                     | non-metastatic cells 5, protein expressed in (nucleoside-diphosphate kinase)              |
| 206214_at   | PLA2G7                   | phospholipase A2, group VII (platelet-activating factor acetylhydrolase, plasma)          |
| 206245_s_at | IVNS1ABP                 | influenza virus NS1A binding protein                                                      |
| 206307_s_at | FOXD1                    | forkhead box D1                                                                           |
| 206364_at   | KIF14                    | kinesin family member 14                                                                  |
| 206366_x_at | XCL1                     | chemokine (C motif) ligand 1                                                              |
| 206391_at   | RARRES1                  | retinoic acid receptor responder (tazarotene induced) 1                                   |
| 206392_s_at | RARRES1                  | retinoic acid receptor responder (tazarotene induced) 1                                   |
| 206401_s_at | MAPT                     | microtubule-associated protein tau                                                        |
| 206407_s_at | CCL13                    | chemokine (C-C motif) ligand 13                                                           |
| 206469_x_at | AKR7A3                   | aldo-keto reductase family 7, member A3 (aflatoxin aldehyde reductase)                    |
| 206486_at   | LAG3                     | lymphocyte-activation gene 3                                                              |
| 206499_s_at | RCC1 /// SNHG3-RCC1      | regulator of chromosome condensation 1 /// SNHG3-RCC1 readthrough transcript              |
| 206503_x_at | PML                      | promyelocytic leukemia                                                                    |
| 206600_s_at | LOC100133772 /// SLC16A5 | similar to MCT /// solute carrier family 16, member 5 (monocarboxylic acid transporter 6) |
| 206632_s_at | APOBEC3B                 | apolipoprotein B mRNA editing enzyme, catalytic polypeptide-like 3B                       |
| 206734_at   | JRKL                     | jerky homolog-like (mouse)                                                                |

|             |                     |                                                                                               |
|-------------|---------------------|-----------------------------------------------------------------------------------------------|
| 206754_s_at | CYP2B6 /// CYP2B7P1 | cytochrome P450, family 2, subfamily B, polypeptide 6                                         |
| 206869_at   | CHAD                | chondroadherin                                                                                |
| 206974_at   | CXCR6               | chemokine (C-X-C motif) receptor 6                                                            |
| 207030_s_at | CSRP2               | cysteine and glycine-rich protein 2                                                           |
| 207038_at   | SLC16A6             | solute carrier family 16, member 6 (monocarboxylic acid transporter 7)                        |
| 207039_at   | CDKN2A              | cyclin-dependent kinase inhibitor 2A (melanoma, p16, inhibits CDK4)                           |
| 207076_s_at | ASS1                | argininosuccinate synthetase 1                                                                |
| 207132_x_at | PFDN5               | prefoldin subunit 5                                                                           |
| 207153_s_at | GLMN                | glomulin, FKBP associated protein                                                             |
| 207170_s_at | LETMD1              | LETM1 domain containing 1                                                                     |
| 207351_s_at | SH2D2A              | SH2 domain protein 2A                                                                         |
| 207551_s_at | MSL3                | male-specific lethal 3 homolog (Drosophila)                                                   |
| 207828_s_at | CENPF               | centromere protein F, 350/400ka (mitosin)                                                     |
| 207843_x_at | CYB5A               | cytochrome b5 type A (microsomal)                                                             |
| 207891_s_at | HAUS7 /// TREX2     | HAUS augmin-like complex, subunit 7 /// three prime repair exonuclease 2                      |
| 207998_s_at | CACNA1D             | calcium channel, voltage-dependent, L type, alpha 1D subunit                                  |
| 208030_s_at | ADD1                | adducin 1 (alpha)                                                                             |
| 208079_s_at | AURKA               | aurora kinase A                                                                               |
| 208092_s_at | FAM49A              | family with sequence similarity 49, member A                                                  |
| 208103_s_at | ANP32E              | acidic (leucine-rich) nuclear phosphoprotein 32 family, member E                              |
| 208140_s_at | LRRRC48             | leucine rich repeat containing 48                                                             |
| 208190_s_at | LSR                 | lipolysis stimulated lipoprotein receptor                                                     |
| 208305_at   | PGR                 | progesterone receptor                                                                         |
| 208393_s_at | RAD50               | RAD50 homolog ( <i>S. cerevisiae</i> )                                                        |
| 208433_s_at | LRP8                | low density lipoprotein receptor-related protein 8, apolipoprotein e receptor                 |
| 208451_s_at | C4A /// C4B         | complement component 4A (Rodgers blood group) /// complement component 4B (Chido blood group) |
| 208503_s_at | GATAD1              | GATA zinc finger domain containing 1                                                          |
| 208517_x_at | BTF3                | basic transcription factor 3                                                                  |
| 208611_s_at | SPTAN1              | spectrin, alpha, non-erythrocytic 1 (alpha-fodrin)                                            |
| 208613_s_at | FLNB                | filamin B, beta (actin binding protein 278)                                                   |
| 208614_s_at | FLNB                | filamin B, beta (actin binding protein 278)                                                   |
| 208616_s_at | PTP4A2              | protein tyrosine phosphatase type IVA, member 2                                               |
| 208627_s_at | YBX1                | Y box binding protein 1                                                                       |

|             |          |                                                                                                |
|-------------|----------|------------------------------------------------------------------------------------------------|
| 208628_s_at | YBX1     | Y box binding protein 1                                                                        |
| 208682_s_at | MAGED2   | melanoma antigen family D, 2                                                                   |
| 208693_s_at | GARS     | glycyl-tRNA synthetase                                                                         |
| 208712_at   | CCND1    | cyclin D1                                                                                      |
| 208749_x_at | FLOT1    | flotillin 1                                                                                    |
| 208764_s_at | ATP5G2   | ATP synthase, H <sup>+</sup> transporting, mitochondrial F0 complex, subunit C2 (subunit 9)    |
| 208788_at   | ELOVL5   | ELOVL family member 5, elongation of long chain fatty acids (FEN1/Elo2, SUR4/Elo3-like, yeast) |
| 208795_s_at | MCM7     | minichromosome maintenance complex component 7                                                 |
| 208804_s_at | SFRS6    | splicing factor, arginine/serine-rich 6                                                        |
| 208823_s_at | PCK1     | PCK1 protein kinase 1                                                                          |
| 208836_at   | ATP1B3   | ATPase, Na <sup>+</sup> /K <sup>+</sup> transporting, beta 3 polypeptide                       |
| 208870_x_at | ATP5C1   | ATP synthase, H <sup>+</sup> transporting, mitochondrial F1 complex, gamma polypeptide 1       |
| 208873_s_at | REEP5    | receptor accessory protein 5                                                                   |
| 208905_at   | CYCS     | cytochrome c, somatic                                                                          |
| 208945_s_at | BECN1    | beclin 1, autophagy related                                                                    |
| 208969_at   | NDUFA9   | NADH dehydrogenase (ubiquinone) 1 alpha subcomplex, 9, 39kDa                                   |
| 209002_s_at | CALCOCO1 | calcium binding and coiled-coil domain 1                                                       |
| 209004_s_at | FBXL5    | F-box and leucine-rich repeat protein 5                                                        |
| 209026_x_at | TUBB     | tubulin, beta                                                                                  |
| 209045_at   | XPNPEP1  | X-prolyl aminopeptidase (aminopeptidase P) 1, soluble                                          |
| 209123_at   | QDPR     | quinoid dihydropteridine reductase                                                             |
| 209150_s_at | TM9SF1   | transmembrane 9 superfamily member 1                                                           |
| 209155_s_at | NT5C2    | 5'-nucleotidase, cytosolic II                                                                  |
| 209172_s_at | CENPF    | centromere protein F, 350/400ka (mitosin)                                                      |
| 209173_at   | AGR2     | anterior gradient homolog 2 ( <i>Xenopus laevis</i> )                                          |
| 209189_at   | FOS      | v-fos FBJ murine osteosarcoma viral oncogene homolog                                           |
| 209195_s_at | ADCY6    | adenylate cyclase 6                                                                            |
| 209204_at   | LMO4     | LIM domain only 4                                                                              |
| 209205_s_at | LMO4     | LIM domain only 4                                                                              |
| 209212_s_at | KLF5     | Kruppel-like factor 5 (intestinal)                                                             |
| 209311_at   | BCL2L2   | BCL2-like 2                                                                                    |
| 209339_at   | SIAH2    | seven in absentia homolog 2 ( <i>Drosophila</i> )                                              |
| 209341_s_at | IKBKB    | inhibitor of kappa light polypeptide gene enhancer in B-cells, kinase beta                     |

|             |          |                                                                                     |
|-------------|----------|-------------------------------------------------------------------------------------|
| 209342_s_at | IKBKB    | inhibitor of kappa light polypeptide gene enhancer in B-cells, kinase beta          |
| 209349_at   | RAD50    | RAD50 homolog ( <i>S. cerevisiae</i> )                                              |
| 209360_s_at | RUNX1    | runt-related transcription factor 1                                                 |
| 209366_x_at | CYB5A    | cytochrome b5 type A (microsomal)                                                   |
| 209373_at   | MALL     | mal, T-cell differentiation protein-like                                            |
| 209375_at   | XPC      | xeroderma pigmentosum, complementation group C                                      |
| 209408_at   | KIF2C    | kinesin family member 2C                                                            |
| 209443_at   | SERPINA5 | serpin peptidase inhibitor, clade A (alpha-1 antiproteinase, antitrypsin), member 5 |
| 209459_s_at | ABAT     | 4-aminobutyrate aminotransferase                                                    |
| 209460_at   | ABAT     | 4-aminobutyrate aminotransferase                                                    |
| 209464_at   | AURKB    | aurora kinase B                                                                     |
| 209545_s_at | RIPK2    | receptor-interacting serine-threonine kinase 2                                      |
| 209602_s_at | GATA3    | GATA binding protein 3                                                              |
| 209603_at   | GATA3    | GATA binding protein 3                                                              |
| 209604_s_at | GATA3    | GATA binding protein 3                                                              |
| 209623_at   | MCCC2    | methylcrotonoyl-Coenzyme A carboxylase 2 (beta)                                     |
| 209624_s_at | MCCC2    | methylcrotonoyl-Coenzyme A carboxylase 2 (beta)                                     |
| 209626_s_at | OSBPL3   | oxysterol binding protein-like 3                                                    |
| 209642_at   | BUB1     | budding uninhibited by benzimidazoles 1 homolog (yeast)                             |
| 209644_x_at | CDKN2A   | cyclin-dependent kinase inhibitor 2A (melanoma, p16, inhibits CDK4)                 |
| 209680_s_at | KIFC1    | kinesin family member C1                                                            |
| 209681_at   | SLC19A2  | solute carrier family 19 (thiamine transporter), member 2                           |
| 209696_at   | FBP1     | fructose-1,6-bisphosphatase 1                                                       |
| 209714_s_at | CDKN3    | cyclin-dependent kinase inhibitor 3                                                 |
| 209740_s_at | PNPLA4   | patatin-like phospholipase domain containing 4                                      |
| 209747_at   | TGFB3    | transforming growth factor, beta 3                                                  |
| 209770_at   | BTN3A1   | butyrophilin, subfamily 3, member A1                                                |
| 209773_s_at | RRM2     | ribonucleotide reductase M2 polypeptide                                             |
| 209791_at   | PADI2    | peptidyl arginine deiminase, type II                                                |
| 209799_at   | PRKAA1   | protein kinase, AMP-activated, alpha 1 catalytic subunit                            |
| 209800_at   | KRT16    | keratin 16                                                                          |
| 209825_s_at | UCK2     | uridine-cytidine kinase 2                                                           |
| 209832_s_at | CDT1     | chromatin licensing and DNA replication factor 1                                    |



|             |                   |                                                                                  |
|-------------|-------------------|----------------------------------------------------------------------------------|
| 209870_s_at | APBA2             | amyloid beta (A4) precursor protein-binding, family A, member 2                  |
| 209871_s_at | APBA2             | amyloid beta (A4) precursor protein-binding, family A, member 2                  |
| 209885_at   | RHOD              | ras homolog gene family, member D                                                |
| 209924_at   | CCL18             | chemokine (C-C motif) ligand 18 (pulmonary and activation-regulated)             |
| 209934_s_at | ATP2C1            | ATPase, Ca <sup>++</sup> transporting, type 2C, member 1                         |
| 209939_x_at | CFLAR             | CASP8 and FADD-like apoptosis regulator                                          |
| 209990_s_at | GABBR2            | gamma-aminobutyric acid (GABA) B receptor, 2                                     |
| 210006_at   | ABHD14A           | abhydrolase domain containing 14A                                                |
| 210024_s_at | UBE2E3            | ubiquitin-conjugating enzyme E2E 3 (UBC4/5 homolog, yeast)                       |
| 210026_s_at | CARD10            | caspase recruitment domain family, member 10                                     |
| 210029_at   | IDO1              | indoleamine 2,3-dioxygenase 1                                                    |
| 210052_s_at | TPX2              | TPX2, microtubule-associated, homolog (Xenopus laevis)                           |
| 210053_at   | TAF5              | TAF5 RNA polymerase II, TATA box binding protein (TBP)-associated factor, 100kDa |
| 210074_at   | CTSL2             | cathepsin L2                                                                     |
| 210085_s_at | ANXA9             | annexin A9                                                                       |
| 210093_s_at | MAGOH             | mago-nashi homolog, proliferation-associated (Drosophila)                        |
| 210108_at   | CACNA1D           | calcium channel, voltage-dependent, L type, alpha 1D subunit                     |
| 210139_s_at | PMP22             | peripheral myelin protein 22                                                     |
| 210142_x_at | FLOT1             | flotillin 1                                                                      |
| 210163_at   | CXCL11            | chemokine (C-X-C motif) ligand 11                                                |
| 210164_at   | GZMB              | granzyme B (granzyme 2, cytotoxic T-lymphocyte-associated serine esterase 1)     |
| 210239_at   | IRX5              | iroquois homeobox 5                                                              |
| 210272_at   | CYP2B7P1          | cytochrome P450, family 2, subfamily B, polypeptide 7 pseudogene 1               |
| 210347_s_at | BCL11A            | B-cell CLL/lymphoma 11A (zinc finger protein)                                    |
| 210354_at   | IFNG              | interferon, gamma                                                                |
| 210357_s_at | SMOX              | spermine oxidase                                                                 |
| 210466_s_at | SERBP1            | SERPINE1 mRNA binding protein 1                                                  |
| 210546_x_at | CTAG1A /// CTAG1B | cancer/testis antigen 1A /// cancer/testis antigen 1B                            |
| 210648_x_at | SNX3              | sorting nexin 3                                                                  |
| 210652_s_at | TTC39A            | tetratricopeptide repeat domain 39A                                              |
| 210735_s_at | CA12              | carbonic anhydrase XII                                                           |
| 210821_x_at | CENPA             | centromere protein A                                                             |
| 210826_x_at | RAD17             | RAD17 homolog (S. pombe)                                                         |

|             |                   |                                                                                                      |
|-------------|-------------------|------------------------------------------------------------------------------------------------------|
| 210908_s_at | PFDN5             | prefoldin subunit 5                                                                                  |
| 210958_s_at | MAST4             | microtubule associated serine/threonine kinase family member 4                                       |
| 210959_s_at | SRD5A1            | steroid-5-alpha-reductase, alpha polypeptide 1 (3-oxo-5 alpha-steroid delta 4-dehydrogenase alpha 1) |
| 210983_s_at | MCM7              | minichromosome maintenance complex component 7                                                       |
| 210995_s_at | TRIM23            | tripartite motif-containing 23                                                                       |
| 211000_s_at | IL6ST             | interleukin 6 signal transducer (gp130, oncostatin M receptor)                                       |
| 211013_x_at | PML               | promyelocytic leukemia                                                                               |
| 211042_x_at | MCAM              | melanoma cell adhesion molecule                                                                      |
| 211056_s_at | SRD5A1            | steroid-5-alpha-reductase, alpha polypeptide 1 (3-oxo-5 alpha-steroid delta 4-dehydrogenase alpha 1) |
| 211122_s_at | CXCL11            | chemokine (C-X-C motif) ligand 11                                                                    |
| 211248_s_at | CHRD              | chordin                                                                                              |
| 211519_s_at | KIF2C             | kinesin family member 2C                                                                             |
| 211596_s_at | LRIG1             | leucine-rich repeats and immunoglobulin-like domains 1                                               |
| 211605_s_at | RARA              | retinoic acid receptor, alpha                                                                        |
| 211674_x_at | CTAG1A /// CTAG1B | cancer/testis antigen 1A /// cancer/testis antigen 1B                                                |
| 211679_x_at | GABBR2            | gamma-aminobutyric acid (GABA) B receptor, 2                                                         |
| 211712_s_at | ANXA9             | annexin A9                                                                                           |
| 211714_x_at | TUBB              | tubulin, beta                                                                                        |
| 211725_s_at | BID               | BH3 interacting domain death agonist                                                                 |
| 211764_s_at | UBE2D1            | ubiquitin-conjugating enzyme E2D 1 (UBC4/5 homolog, yeast)                                           |
| 211938_at   | EIF4B             | eukaryotic translation initiation factor 4B                                                          |
| 211939_x_at | BTF3              | basic transcription factor 3                                                                         |
| 211967_at   | TMEM123           | transmembrane protein 123                                                                            |
| 211986_at   | AHNAK             | AHNAK nucleoprotein                                                                                  |
| 212020_s_at | MKI67             | antigen identified by monoclonal antibody Ki-67                                                      |
| 212022_s_at | MKI67             | antigen identified by monoclonal antibody Ki-67                                                      |
| 212023_s_at | MKI67             | antigen identified by monoclonal antibody Ki-67                                                      |
| 212099_at   | RHOB              | ras homolog gene family, member B                                                                    |
| 212141_at   | MCM4              | minichromosome maintenance complex component 4                                                       |
| 212153_at   | POGZ              | pogo transposable element with ZNF domain                                                            |
| 212156_at   | VPS39             | vacuolar protein sorting 39 homolog (S. cerevisiae)                                                  |
| 212195_at   | IL6ST             | interleukin 6 signal transducer (gp130, oncostatin M receptor)                                       |
| 212196_at   | IL6ST             | interleukin 6 signal transducer (gp130, oncostatin M receptor)                                       |

|             |          |                                                                                           |
|-------------|----------|-------------------------------------------------------------------------------------------|
| 212207_at   | MED13L   | mediator complex subunit 13-like                                                          |
| 212208_at   | MED13L   | mediator complex subunit 13-like                                                          |
| 212209_at   | MED13L   | mediator complex subunit 13-like                                                          |
| 212219_at   | PSME4    | proteasome (prosome, macropain) activator subunit 4                                       |
| 212220_at   | PSME4    | proteasome (prosome, macropain) activator subunit 4                                       |
| 212242_at   | TUBA4A   | tubulin, alpha 4a                                                                         |
| 212247_at   | NUP205   | nucleoporin 205kDa                                                                        |
| 212274_at   | LPIN1    | lipin 1                                                                                   |
| 212276_at   | LPIN1    | lipin 1                                                                                   |
| 212294_at   | GNG12    | guanine nucleotide binding protein (G protein), gamma 12                                  |
| 212314_at   | KIAA0746 | KIAA0746 protein                                                                          |
| 212360_at   | AMPD2    | adenosine monophosphate deaminase 2 (isoform L)                                           |
| 212378_at   | GART     | phosphoribosylglycinamide formyltransferase, phosphoribosylglycinamide synthetase         |
| 212403_at   | UBE3B    | ubiquitin protein ligase E3B                                                              |
| 212416_at   | SCAMP1   | secretory carrier membrane protein 1                                                      |
| 212419_at   | ZCCHC24  | zinc finger, CCHC domain containing 24                                                    |
| 212423_at   | ZCCHC24  | zinc finger, CCHC domain containing 24                                                    |
| 212426_s_at | YWHAQ    | tyrosine 3-monooxygenase/tryptophan 5-monooxygenase activation protein, theta polypeptide |
| 212430_at   | RBM38    | RNA binding motif protein 38                                                              |
| 212441_at   | KIAA0232 | KIAA0232                                                                                  |
| 212442_s_at | LASS6    | LAG1 homolog, ceramide synthase 6                                                         |
| 212462_at   | MYST4    | MYST histone acetyltransferase (monocytic leukemia) 4                                     |
| 212492_s_at | KDM4B    | lysine (K)-specific demethylase 4B                                                        |
| 212494_at   | TENC1    | tensin like C1 domain containing phosphatase (tensin 2)                                   |
| 212495_at   | KDM4B    | lysine (K)-specific demethylase 4B                                                        |
| 212496_s_at | KDM4B    | lysine (K)-specific demethylase 4B                                                        |
| 212501_at   | CEBPB    | CCAAT/enhancer binding protein (C/EBP), beta                                              |
| 212508_at   | MOAP1    | modulator of apoptosis 1                                                                  |
| 212510_at   | GPD1L    | glycerol-3-phosphate dehydrogenase 1-like                                                 |
| 212527_at   | PPPDE2   | PPPDE peptidase domain containing 2                                                       |
| 212551_at   | CAP2     | CAP, adenylate cyclase-associated protein, 2 (yeast)                                      |
| 212554_at   | CAP2     | CAP, adenylate cyclase-associated protein, 2 (yeast)                                      |
| 212638_s_at | WWP1     | WW domain containing E3 ubiquitin protein ligase 1                                        |

|             |           |                                                                            |
|-------------|-----------|----------------------------------------------------------------------------|
| 212660_at   | PHF15     | PHD finger protein 15                                                      |
| 212678_at   | NF1       | neurofibromin 1                                                            |
| 212680_x_at | PPP1R14B  | protein phosphatase 1, regulatory (inhibitor) subunit 14B                  |
| 212692_s_at | LRBA      | LPS-responsive vesicle trafficking, beach and anchor containing            |
| 212697_at   | FAM134C   | family with sequence similarity 134, member C                              |
| 212715_s_at | MICAL3    | microtubule associated monooxygenase, calponin and LIM domain containing 3 |
| 212744_at   | BBS4      | Bardet-Biedl syndrome 4                                                    |
| 212745_s_at | BBS4      | Bardet-Biedl syndrome 4                                                    |
| 212770_at   | TLE3      | transducin-like enhancer of split 3 (E(sp1) homolog, Drosophila)           |
| 212780_at   | SOS1      | son of sevenless homolog 1 (Drosophila)                                    |
| 212816_s_at | CBS       | cystathionine-beta-synthase                                                |
| 212846_at   | RRP1B     | ribosomal RNA processing 1 homolog B (S. cerevisiae)                       |
| 212885_at   | MPHOSPH10 | M-phase phosphoprotein 10 (U3 small nucleolar ribonucleoprotein)           |
| 212908_at   | DNAJC16   | DnaJ (Hsp40) homolog, subfamily C, member 16                               |
| 212911_at   | DNAJC16   | DnaJ (Hsp40) homolog, subfamily C, member 16                               |
| 212949_at   | NCAPH     | non-SMC condensin I complex, subunit H                                     |
| 212956_at   | TBC1D9    | TBC1 domain family, member 9 (with GRAM domain)                            |
| 212960_at   | TBC1D9    | TBC1 domain family, member 9 (with GRAM domain)                            |
| 212970_at   | APBB2     | amyloid beta (A4) precursor protein-binding, family B, member 2            |
| 212978_at   | LRRC8B    | leucine rich repeat containing 8 family, member B                          |
| 212995_x_at | FAM128B   | family with sequence similarity 128, member B                              |
| 213007_at   | FANCI     | Fanconi anemia, complementation group I                                    |
| 213008_at   | FANCI     | Fanconi anemia, complementation group I                                    |
| 213018_at   | GATAD1    | GATA zinc finger domain containing 1                                       |
| 213058_at   | TTC28     | tetratricopeptide repeat domain 28                                         |
| 213063_at   | ZC3H14    | zinc finger CCCH-type containing 14                                        |
| 213064_at   | ZC3H14    | zinc finger CCCH-type containing 14                                        |
| 213088_s_at | DNAJC9    | DnaJ (Hsp40) homolog, subfamily C, member 9                                |
| 213097_s_at | DNAJC2    | DnaJ (Hsp40) homolog, subfamily C, member 2                                |
| 213101_s_at | ACTR3     | ARP3 actin-related protein 3 homolog (yeast)                               |
| 213103_at   | STARD13   | StAR-related lipid transfer (START) domain containing 13                   |
| 213110_s_at | COL4A5    | collagen, type IV, alpha 5                                                 |
| 213113_s_at | SLC43A3   | solute carrier family 43, member 3                                         |

|             |          |                                                                                          |
|-------------|----------|------------------------------------------------------------------------------------------|
| 213123_at   | MFAP3    | microfibrillar-associated protein 3                                                      |
| 213134_x_at | BTG3     | BTG family, member 3                                                                     |
| 213136_at   | PTPN2    | protein tyrosine phosphatase, non-receptor type 2                                        |
| 213137_s_at | PTPN2    | protein tyrosine phosphatase, non-receptor type 2                                        |
| 213166_x_at | FAM128A  | family with sequence similarity 128, member A                                            |
| 213185_at   | KIAA0556 | KIAA0556                                                                                 |
| 213226_at   | CCNA2    | cyclin A2                                                                                |
| 213234_at   | KIAA1467 | KIAA1467                                                                                 |
| 213245_at   | ADCY1    | adenylate cyclase 1 (brain)                                                              |
| 213260_at   | FOXC1    | forkhead box C1                                                                          |
| 213279_at   | DHRS1    | dehydrogenase/reductase (SDR family) member 1                                            |
| 213283_s_at | SALL2    | sal-like 2 (Drosophila)                                                                  |
| 213285_at   | TMEM30B  | transmembrane protein 30B                                                                |
| 213304_at   | FAM179B  | family with sequence similarity 179, member B                                            |
| 213334_x_at | HAUS7    | HAUS augmin-like complex, subunit 7                                                      |
| 213345_at   | NFATC4   | nuclear factor of activated T-cells, cytoplasmic, calcineurin-dependent 4                |
| 213366_x_at | ATP5C1   | ATP synthase, H <sup>+</sup> transporting, mitochondrial F1 complex, gamma polypeptide 1 |
| 213392_at   | IQCK     | IQ motif containing K                                                                    |
| 213397_x_at | RNASE4   | ribonuclease, RNase A family, 4                                                          |
| 213419_at   | APBB2    | amyloid beta (A4) precursor protein-binding, family B, member 2                          |
| 213427_at   | RPP40    | ribonuclease P/MRP 40kDa subunit                                                         |
| 213512_at   | C14orf79 | chromosome 14 open reading frame 79                                                      |
| 213523_at   | CCNE1    | cyclin E1                                                                                |
| 213540_at   | HSD17B8  | hydroxysteroid (17-beta) dehydrogenase 8                                                 |
| 213564_x_at | LDHB     | lactate dehydrogenase B                                                                  |
| 213571_s_at | EIF4E2   | eukaryotic translation initiation factor 4E family member 2                              |
| 213599_at   | OIP5     | Opa interacting protein 5                                                                |
| 213627_at   | MAGED2   | melanoma antigen family D, 2                                                             |
| 213639_s_at | ZNF500   | zinc finger protein 500                                                                  |
| 213647_at   | DNA2     | DNA replication helicase 2 homolog (yeast)                                               |
| 213702_x_at | ASAH1    | N-acylsphingosine amidohydrolase (acid ceramidase) 1                                     |
| 213707_s_at | DLX5     | distal-less homeobox 5                                                                   |
| 213712_at   | ELOVL2   | elongation of very long chain fatty acids (FEN1/Elo2, SUR4/Elo3, yeast)-like 2           |

|             |                               |                                                                                                          |
|-------------|-------------------------------|----------------------------------------------------------------------------------------------------------|
| 213923_at   | RAP2B                         | RAP2B, member of RAS oncogene family                                                                     |
| 213933_at   | PTGER3                        | prostaglandin E receptor 3 (subtype EP3)                                                                 |
| 213941_x_at | RPS7                          | ribosomal protein S7                                                                                     |
| 214049_x_at | CD7                           | CD7 molecule                                                                                             |
| 214051_at   | TMSB15B                       | thymosin beta 15B                                                                                        |
| 214053_at   | ERBB4                         | v-erb-a erythroblastic leukemia viral oncogene homolog 4 (avian)                                         |
| 214077_x_at | MEIS3P1                       | Meis homeobox 3 pseudogene 1                                                                             |
| 214088_s_at | FUT3                          | fucosyltransferase 3 (galactoside 3(4)-L-fucosyltransferase, Lewis blood group)                          |
| 214104_at   | GPR161                        | G protein-coupled receptor 161                                                                           |
| 214106_s_at | GMDS                          | GDP-mannose 4,6-dehydratase                                                                              |
| 214109_at   | LRBA                          | LPS-responsive vesicle trafficking, beach and anchor containing                                          |
| 214164_x_at | CA12                          | carbonic anhydrase XII                                                                                   |
| 214259_s_at | AKR7A2                        | aldo-keto reductase family 7, member A2 (aflatoxin aldehyde reductase)                                   |
| 214334_x_at | DAZAP2                        | DAZ associated protein 2                                                                                 |
| 214426_x_at | CHAF1A                        | chromatin assembly factor 1, subunit A (p150)                                                            |
| 214428_x_at | C4A /// C4B                   | complement component 4A (Rodgers blood group) /// complement component 4B (Chido blood group)            |
| 214431_at   | GMPS                          | guanine monphosphate synthetase                                                                          |
| 214433_s_at | SELENBP1                      | selenium binding protein 1                                                                               |
| 214440_at   | NAT1                          | N-acetyltransferase 1 (arylamine N-acetyltransferase)                                                    |
| 214552_s_at | RABEP1                        | rabaptin, RAB GTPase binding effector protein 1                                                          |
| 214567_s_at | XCL1 /// XCL2                 | chemokine (C motif) ligand 1 /// chemokine (C motif) ligand 2                                            |
| 214595_at   | KCNG1                         | potassium voltage-gated channel, subfamily G, member 1                                                   |
| 214617_at   | PRF1                          | perforin 1 (pore forming protein)                                                                        |
| 214705_at   | INADL                         | InaD-like (Drosophila)                                                                                   |
| 214710_s_at | CCNB1                         | cyclin B1                                                                                                |
| 214735_at   | IPCEF1                        | interaction protein for cytohesin exchange factors 1                                                     |
| 214736_s_at | ADD1                          | adducin 1 (alpha)                                                                                        |
| 214745_at   | PLCH1                         | phospholipase C, eta 1                                                                                   |
| 214838_at   | SFT2D2                        | SFT2 domain containing 2                                                                                 |
| 214855_s_at | GARNL1<br>ANKHD1-EIF4EBP3 /// | GTPase activating Rap/RanGAP domain-like 1                                                               |
| 214919_s_at | EIF4EBP3                      | ANKHD1-EIF4EBP3 readthrough transcript /// eukaryotic translation initiation factor 4E binding protein 3 |
| 214924_s_at | TRAK1                         | trafficking protein, kinesin binding 1                                                                   |
| 215001_s_at | GLUL                          | glutamate-ammonia ligase (glutamine synthetase)                                                          |

|             |           |                                                                                     |
|-------------|-----------|-------------------------------------------------------------------------------------|
| 215223_s_at | SOD2      | superoxide dismutase 2, mitochondrial                                               |
| 215616_s_at | KDM4B     | lysine (K)-specific demethylase 4B                                                  |
| 215726_s_at | CYB5A     | cytochrome b5 type A (microsomal)                                                   |
| 215807_s_at | PLXNB1    | plexin B1                                                                           |
| 215867_x_at | CA12      | carbonic anhydrase XII                                                              |
| 215942_s_at | GTSE1     | G-2 and S-phase expressed 1                                                         |
| 215947_s_at | FAM136A   | family with sequence similarity 136, member A                                       |
| 215994_x_at | TBC1D9B   | TBC1 domain family, member 9B (with GRAM domain)                                    |
| 216010_x_at | FUT3      | fucosyltransferase 3 (galactoside 3(4)-L-fucosyltransferase, Lewis blood group)     |
| 216092_s_at | SLC7A8    | solute carrier family 7 (cationic amino acid transporter, y+ system), member 8      |
| 216237_s_at | MCM5      | minichromosome maintenance complex component 5                                      |
| 216264_s_at | LAMB2     | laminin, beta 2 (laminin S)                                                         |
| 216267_s_at | TMEM115   | transmembrane protein 115                                                           |
| 216300_x_at | RARA      | retinoic acid receptor, alpha                                                       |
| 216381_x_at | AKR7A3    | aldo-keto reductase family 7, member A3 (aflatoxin aldehyde reductase)              |
| 216560_x_at | IGL@      | immunoglobulin lambda locus                                                         |
| 216885_s_at | WDR42A    | WD repeat domain 42A                                                                |
| 216905_s_at | ST14      | suppression of tumorigenicity 14 (colon carcinoma)                                  |
| 216952_s_at | LMNB2     | lamin B2                                                                            |
| 216977_x_at | SNRPA1    | small nuclear ribonucleoprotein polypeptide A'                                      |
| 216988_s_at | PTP4A2    | protein tyrosine phosphatase type IVA, member 2                                     |
| 217499_x_at | OR7E37P   | olfactory receptor, family 7, subfamily E, member 37 pseudogene                     |
| 217770_at   | PIGT      | phosphatidylinositol glycan anchor biosynthesis, class T                            |
| 217794_at   | PRR13     | proline rich 13                                                                     |
| 217832_at   | SYNCRIP   | synaptotagmin binding, cytoplasmic RNA interacting protein                          |
| 217834_s_at | SYNCRIP   | synaptotagmin binding, cytoplasmic RNA interacting protein                          |
| 217838_s_at | EVL       | Enah/Vasp-like                                                                      |
| 217844_at   | CTDSP1    | CTD (carboxy-terminal domain, RNA polymerase II, polypeptide A) small phosphatase 1 |
| 217870_s_at | CMPK1     | cytidine monophosphate (UMP-CMP) kinase 1, cytosolic                                |
| 217892_s_at | LIMA1     | LIM domain and actin binding 1                                                      |
| 217894_at   | KCTD3     | potassium channel tetramerisation domain containing 3                               |
| 217905_at   | C10orf119 | chromosome 10 open reading frame 119                                                |
| 217906_at   | KLHDC2    | kelch domain containing 2                                                           |

|             |                        |                                                                                                       |
|-------------|------------------------|-------------------------------------------------------------------------------------------------------|
| 217914_at   | TPCN1                  | two pore segment channel 1                                                                            |
| 217938_s_at | KCMF1                  | potassium channel modulatory factor 1                                                                 |
| 217972_at   | CHCHD3                 | coiled-coil-helix-coiled-coil-helix domain containing 3                                               |
| 217979_at   | TSPAN13                | tetraspanin 13                                                                                        |
| 217990_at   | GMPR2                  | guanosine monophosphate reductase 2                                                                   |
| 218002_s_at | CXCL14                 | chemokine (C-X-C motif) ligand 14                                                                     |
| 218009_s_at | PRC1                   | protein regulator of cytokinesis 1                                                                    |
| 218018_at   | PDXK                   | pyridoxal (pyridoxine, vitamin B6) kinase                                                             |
| 218035_s_at | RBM47                  | RNA binding motif protein 47                                                                          |
| 218037_at   | FAM134A                | family with sequence similarity 134, member A                                                         |
| 218039_at   | NUSAP1                 | nucleolar and spindle associated protein 1                                                            |
| 218051_s_at | NT5DC2                 | 5'-nucleotidase domain containing 2                                                                   |
| 218065_s_at | TMEM9B                 | TMEM9 domain family, member B                                                                         |
| 218086_at   | NPDC1                  | neural proliferation, differentiation and control, 1                                                  |
| 218094_s_at | DBNDD2 /// SYS1-DBNDD2 | dysbindin (dystrobrevin binding protein 1) domain containing 2 /// SYS1-DBNDD2 readthrough transcript |
| 218104_at   | TEX10                  | testis expressed 10                                                                                   |
| 218131_s_at | GATAD2A                | GATA zinc finger domain containing 2A                                                                 |
| 218146_at   | GLT8D1                 | glycosyltransferase 8 domain containing 1                                                             |
| 218193_s_at | GOLT1B                 | golgi transport 1 homolog B ( <i>S. cerevisiae</i> )                                                  |
| 218195_at   | C6orf211               | chromosome 6 open reading frame 211                                                                   |
| 218211_s_at | MLPH                   | melanophilin                                                                                          |
| 218223_s_at | PLEKHO1                | pleckstrin homology domain containing, family O member 1                                              |
| 218230_at   | ARFIP1                 | ADP-ribosylation factor interacting protein 1                                                         |
| 218235_s_at | UTP11L                 | UTP11-like, U3 small nucleolar ribonucleoprotein, (yeast)                                             |
| 218243_at   | RUFY1                  | RUN and FYVE domain containing 1                                                                      |
| 218259_at   | MKL2                   | MKL/myocardin-like 2                                                                                  |
| 218262_at   | RMND5B                 | required for meiotic nuclear division 5 homolog B ( <i>S. cerevisiae</i> )                            |
| 218308_at   | TACC3                  | transforming, acidic coiled-coil containing protein 3                                                 |
| 218319_at   | PELI1                  | pellino homolog 1 ( <i>Drosophila</i> )                                                               |
| 218328_at   | COQ4                   | coenzyme Q4 homolog ( <i>S. cerevisiae</i> )                                                          |
| 218336_at   | PFDN2                  | prefoldin subunit 2                                                                                   |
| 218349_s_at | ZWILCH                 | Zwilch, kinetochore associated, homolog ( <i>Drosophila</i> )                                         |
| 218353_at   | RGS5                   | regulator of G-protein signaling 5                                                                    |



|             |              |                                                                    |
|-------------|--------------|--------------------------------------------------------------------|
| 218355_at   | KIF4A        | kinesin family member 4A                                           |
| 218374_s_at | C12orf4      | chromosome 12 open reading frame 4                                 |
| 218394_at   | ROGDI        | rogdi homolog (Drosophila)                                         |
| 218437_s_at | LZTFL1       | leucine zipper transcription factor-like 1                         |
| 218440_at   | MCCC1        | methylcrotonoyl-Coenzyme A carboxylase 1 (alpha)                   |
| 218445_at   | H2AFY2       | H2A histone family, member Y2                                      |
| 218447_at   | C16orf61     | chromosome 16 open reading frame 61                                |
| 218471_s_at | BBS1         | Bardet-Biedl syndrome 1                                            |
| 218487_at   | ALAD         | aminolevulinate, delta-, dehydratase                               |
| 218496_at   | RNASEH1      | ribonuclease H1                                                    |
| 218497_s_at | RNASEH1      | ribonuclease H1                                                    |
| 218499_at   | RP6-213H19.1 | serine/threonine protein kinase MST4                               |
| 218502_s_at | TRPS1        | trichorhinophalangeal syndrome I                                   |
| 218510_x_at | FAM134B      | family with sequence similarity 134, member B                      |
| 218512_at   | WDR12        | WD repeat domain 12                                                |
| 218532_s_at | FAM134B      | family with sequence similarity 134, member B                      |
| 218537_at   | HCFC1R1      | host cell factor C1 regulator 1 (XPO1 dependent)                   |
| 218540_at   | THTPA        | thiamine triphosphatase                                            |
| 218542_at   | CEP55        | centrosomal protein 55kDa                                          |
| 218552_at   | ECHDC2       | enoyl Coenzyme A hydratase domain containing 2                     |
| 218564_at   | RFWD3        | ring finger and WD repeat domain 3                                 |
| 218572_at   | CHMP4A       | chromatin modifying protein 4A                                     |
| 218584_at   | TCTN1        | tectonic family member 1                                           |
| 218588_s_at | FAM114A2     | family with sequence similarity 114, member A2                     |
| 218593_at   | RBM28        | RNA binding motif protein 28                                       |
| 218600_at   | LIMD2        | LIM domain containing 2                                            |
| 218617_at   | TRIT1        | tRNA isopentenyltransferase 1                                      |
| 218620_s_at | HEMK1        | HemK methyltransferase family member 1                             |
| 218660_at   | DYSF         | dysferlin, limb girdle muscular dystrophy 2B (autosomal recessive) |
| 218662_s_at | NCAPG        | non-SMC condensin I complex, subunit G                             |
| 218663_at   | NCAPG        | non-SMC condensin I complex, subunit G                             |
| 218684_at   | LRRC8D       | leucine rich repeat containing 8 family, member D                  |
| 218686_s_at | RHBDF1       | rhomboïd 5 homolog 1 (Drosophila)                                  |

|             |          |                                                                           |
|-------------|----------|---------------------------------------------------------------------------|
| 218692_at   | GOLSYN   | Golgi-localized protein                                                   |
| 218726_at   | HJURP    | Holliday junction recognition protein                                     |
| 218741_at   | CENPM    | centromere protein M                                                      |
| 218755_at   | KIF20A   | kinesin family member 20A                                                 |
| 218757_s_at | UPF3B    | UPF3 regulator of nonsense transcripts homolog B (yeast)                  |
| 218758_s_at | RRP1     | ribosomal RNA processing 1 homolog ( <i>S. cerevisiae</i> )               |
| 218763_at   | STX18    | syntaxin 18                                                               |
| 218769_s_at | ANKRA2   | ankyrin repeat, family A (RFXANK-like), 2                                 |
| 218774_at   | DCPS     | decapping enzyme, scavenger                                               |
| 218806_s_at | VAV3     | vav 3 guanine nucleotide exchange factor                                  |
| 218807_at   | VAV3     | vav 3 guanine nucleotide exchange factor                                  |
| 218813_s_at | SH3GLB2  | SH3-domain GRB2-like endophilin B2                                        |
| 218834_s_at | TMEM132A | transmembrane protein 132A                                                |
| 218856_at   | TNFRSF21 | tumor necrosis factor receptor superfamily, member 21                     |
| 218862_at   | ASB13    | ankyrin repeat and SOCS box-containing 13                                 |
| 218877_s_at | TRMT11   | tRNA methyltransferase 11 homolog ( <i>S. cerevisiae</i> )                |
| 218882_s_at | WDR3     | WD repeat domain 3                                                        |
| 218886_at   | PAK1IP1  | PAK1 interacting protein 1                                                |
| 218894_s_at | MAGOHB   | mago-nashi homolog B ( <i>Drosophila</i> )                                |
| 218921_at   | SIGIRR   | single immunoglobulin and toll-interleukin 1 receptor (TIR) domain        |
| 218931_at   | RAB17    | RAB17, member RAS oncogene family                                         |
| 218949_s_at | QRSL1    | glutaminyl-tRNA synthase (glutamine-hydrolyzing)-like 1                   |
| 218966_at   | MYO5C    | myosin VC                                                                 |
| 218976_at   | DNAJC12  | DnaJ (Hsp40) homolog, subfamily C, member 12                              |
| 218987_at   | ATF7IP   | activating transcription factor 7 interacting protein                     |
| 219000_s_at | DSCC1    | defective in sister chromatid cohesion 1 homolog ( <i>S. cerevisiae</i> ) |
| 219001_s_at | WDR32    | WD repeat domain 32                                                       |
| 219004_s_at | C21orf45 | chromosome 21 open reading frame 45                                       |
| 219006_at   | NDUFAF4  | NADH dehydrogenase (ubiquinone) 1 alpha subcomplex, assembly factor 4     |
| 219010_at   | C1orf106 | chromosome 1 open reading frame 106                                       |
| 219051_x_at | METRN    | meteorin, glial cell differentiation regulator                            |
| 219065_s_at | MEMO1    | mediator of cell motility 1                                               |
| 219083_at   | SHQ1     | SHQ1 homolog ( <i>S. cerevisiae</i> )                                     |

|             |           |                                                                                     |
|-------------|-----------|-------------------------------------------------------------------------------------|
| 219087_at   | ASPN      | asporin                                                                             |
| 219105_x_at | ORC6L     | origin recognition complex, subunit 6 like (yeast)                                  |
| 219114_at   | C3orf18   | chromosome 3 open reading frame 18                                                  |
| 219143_s_at | RPP25     | ribonuclease P/MRP 25kDa subunit                                                    |
| 219153_s_at | THSD4     | thrombospondin, type I, domain containing 4                                         |
| 219197_s_at | SCUBE2    | signal peptide, CUB domain, EGF-like 2                                              |
| 219202_at   | RHBDF2    | rhomoid 5 homolog 2 (Drosophila)                                                    |
| 219206_x_at | TMBIM4    | transmembrane BAX inhibitor motif containing 4                                      |
| 219209_at   | IFIH1     | interferon induced with helicase C domain 1                                         |
| 219222_at   | RBKS      | ribokinase                                                                          |
| 219241_x_at | SSH3      | slingshot homolog 3 (Drosophila)                                                    |
| 219286_s_at | RBM15     | RNA binding motif protein 15                                                        |
| 219306_at   | KIF15     | kinesin family member 15                                                            |
| 219317_at   | POLI      | polymerase (DNA directed) iota                                                      |
| 219385_at   | SLAMF8    | SLAM family member 8                                                                |
| 219386_s_at | SLAMF8    | SLAM family member 8                                                                |
| 219414_at   | CLSTN2    | calsyntenin 2                                                                       |
| 219438_at   | NKAIN1    | Na <sup>+</sup> /K <sup>+</sup> transporting ATPase interacting 1                   |
| 219439_at   | C1GALT1   | core 1 synthase, glycoprotein-N-acetylgalactosamine 3-beta-galactosyltransferase, 1 |
| 219440_at   | RAI2      | retinoic acid induced 2                                                             |
| 219453_at   | KLHL36    | kelch-like 36 (Drosophila)                                                          |
| 219454_at   | EGFL6     | EGF-like-domain, multiple 6                                                         |
| 219455_at   | C7orf63   | chromosome 7 open reading frame 63                                                  |
| 219463_at   | C20orf103 | chromosome 20 open reading frame 103                                                |
| 219469_at   | DYNC2H1   | dynein, cytoplasmic 2, heavy chain 1                                                |
| 219470_x_at | CCNJ      | cyclin J                                                                            |
| 219497_s_at | BCL11A    | B-cell CLL/lymphoma 11A (zinc finger protein)                                       |
| 219498_s_at | BCL11A    | B-cell CLL/lymphoma 11A (zinc finger protein)                                       |
| 219542_at   | NEK11     | NIMA (never in mitosis gene a)- related kinase 11                                   |
| 219544_at   | C13orf34  | chromosome 13 open reading frame 34                                                 |
| 219555_s_at | CENPN     | centromere protein N                                                                |
| 219570_at   | KIF16B    | kinesin family member 16B                                                           |
| 219588_s_at | NCAPG2    | non-SMC condensin II complex, subunit G2                                            |

|             |          |                                                                                                |
|-------------|----------|------------------------------------------------------------------------------------------------|
| 219609_at   | WDR25    | WD repeat domain 25                                                                            |
| 219615_s_at | KCNK5    | potassium channel, subfamily K, member 5                                                       |
| 219634_at   | CHST11   | carbohydrate (chondroitin 4) sulfotransferase 11                                               |
| 219646_at   | DEF8     | differentially expressed in FDCP 8 homolog (mouse)                                             |
| 219648_at   | MREG     | melanoregulin                                                                                  |
| 219682_s_at | TBX3     | T-box 3                                                                                        |
| 219686_at   | STK32B   | serine/threonine kinase 32B                                                                    |
| 219687_at   | HHAT     | hedgehog acyltransferase                                                                       |
| 219753_at   | STAG3    | stromal antigen 3                                                                              |
| 219786_at   | MTL5     | metallothionein-like 5, testis-specific (tesmin)                                               |
| 219787_s_at | ECT2     | epithelial cell transforming sequence 2 oncogene                                               |
| 219806_s_at | C11orf75 | chromosome 11 open reading frame 75                                                            |
| 219833_s_at | EFHC1    | EF-hand domain (C-terminal) containing 1                                                       |
| 219862_s_at | NARF     | nuclear prelamin A recognition factor                                                          |
| 219882_at   | TLL7     | tubulin tyrosine ligase-like family, member 7                                                  |
| 219918_s_at | ASPM     | asp (abnormal spindle) homolog, microcephaly associated (Drosophila)                           |
| 219919_s_at | SSH3     | slingshot homolog 3 (Drosophila)                                                               |
| 219922_s_at | LTBP3    | latent transforming growth factor beta binding protein 3                                       |
| 219956_at   | GALNT6   | UDP-N-acetyl-alpha-D-galactosamine:polypeptide N-acetylgalactosaminyltransferase 6 (GalNAc-T6) |
| 219978_s_at | NUSAP1   | nucleolar and spindle associated protein 1                                                     |
| 219981_x_at | ZNF587   | zinc finger protein 587                                                                        |
| 220094_s_at | CCDC90A  | coiled-coil domain containing 90A                                                              |
| 220134_x_at | FAM176B  | family with sequence similarity 176, member B                                                  |
| 220147_s_at | FAM60A   | family with sequence similarity 60, member A                                                   |
| 220173_at   | C14orf45 | chromosome 14 open reading frame 45                                                            |
| 220192_x_at | SPDEF    | SAM pointed domain containing ets transcription factor                                         |
| 220239_at   | KLHL7    | kelch-like 7 (Drosophila)                                                                      |
| 220255_at   | FANCE    | Fanconi anemia, complementation group E                                                        |
| 220260_at   | TBC1D19  | TBC1 domain family, member 19                                                                  |
| 220559_at   | EN1      | engrailed homeobox 1                                                                           |
| 220581_at   | C6orf97  | chromosome 6 open reading frame 97                                                             |
| 220613_s_at | SYTL2    | synaptotagmin-like 2                                                                           |
| 220624_s_at | ELF5     | E74-like factor 5 (ets domain transcription factor)                                            |

|             |                        |                                                                                                                                                                   |
|-------------|------------------------|-------------------------------------------------------------------------------------------------------------------------------------------------------------------|
| 220625_s_at | ELF5                   | E74-like factor 5 (ets domain transcription factor)                                                                                                               |
| 220651_s_at | MCM10                  | minichromosome maintenance complex component 10                                                                                                                   |
| 220658_s_at | ARNTL2                 | aryl hydrocarbon receptor nuclear translocator-like 2                                                                                                             |
| 220744_s_at | IFT122                 | intraflagellar transport 122 homolog (Chlamydomonas)                                                                                                              |
| 220865_s_at | PDSS1                  | prenyl (decaprenyl) diphosphate synthase, subunit 1                                                                                                               |
| 220892_s_at | PSAT1                  | phosphoserine aminotransferase 1                                                                                                                                  |
| 220917_s_at | WDR19                  | WD repeat domain 19                                                                                                                                               |
| 220956_s_at | EGLN2                  | egl nine homolog 2 (C. elegans)                                                                                                                                   |
| 221012_s_at | TRIM8                  | tripartite motif-containing 8                                                                                                                                     |
| 221046_s_at | GTPBP8                 | GTP-binding protein 8 (putative)                                                                                                                                  |
| 221059_s_at | COTL1                  | coactosin-like 1 (Dictyostelium)                                                                                                                                  |
| 221139_s_at | CSAD                   | cysteine sulfinic acid decarboxylase                                                                                                                              |
| 221203_s_at | YEATS2                 | YEATS domain containing 2                                                                                                                                         |
| 221215_s_at | RIPK4                  | receptor-interacting serine-threonine kinase 4                                                                                                                    |
| 221223_x_at | CISH                   | cytokine inducible SH2-containing protein                                                                                                                         |
| 221253_s_at | TXNDC5                 | thioredoxin domain containing 5 (endoplasmic reticulum)                                                                                                           |
| 221272_s_at | C1orf21                | chromosome 1 open reading frame 21                                                                                                                                |
| 221276_s_at | SYNC                   | syncoilin, intermediate filament protein                                                                                                                          |
| 221277_s_at | PUS3                   | pseudouridylate synthase 3                                                                                                                                        |
| 221436_s_at | CDCA3                  | cell division cycle associated 3                                                                                                                                  |
| 221472_at   | SERINC3                | serine incorporator 3                                                                                                                                             |
| 221477_s_at | SOD2                   | superoxide dismutase 2, mitochondrial                                                                                                                             |
| 221505_at   | ANP32E                 | acidic (leucine-rich) nuclear phosphoprotein 32 family, member E                                                                                                  |
| 221510_s_at | GLS                    | glutaminase                                                                                                                                                       |
| 221516_s_at | SMCR7L                 | Smith-Magenis syndrome chromosome region, candidate 7-like                                                                                                        |
| 221520_s_at | CDCA8                  | cell division cycle associated 8                                                                                                                                  |
| 221523_s_at | RRAGD                  | Ras-related GTP binding D                                                                                                                                         |
| 221524_s_at | RRAGD                  | Ras-related GTP binding D                                                                                                                                         |
| 221562_s_at | SIRT3                  | sirtuin (silent mating type information regulation 2 homolog) 3 (S. cerevisiae)                                                                                   |
| 221580_s_at | TAF1D                  | TATA box binding protein (TBP)-associated factor, RNA polymerase I, D, 41kDa                                                                                      |
| 221591_s_at | FAM64A                 | family with sequence similarity 64, member A<br>similar to cofactor required for Sp1 transcriptional activation, subunit 8, 34kDa /// mediator complex subunit 27 |
| 221598_s_at | LOC100131612 /// MED27 | 27                                                                                                                                                                |
| 221614_s_at | RPH3AL                 | rabphilin 3A-like (without C2 domains)                                                                                                                            |

|             |                          |                                                                                                      |
|-------------|--------------------------|------------------------------------------------------------------------------------------------------|
| 221641_s_at | ACOT9                    | acyl-CoA thioesterase 9                                                                              |
| 221652_s_at | C12orf11                 | chromosome 12 open reading frame 11                                                                  |
| 221677_s_at | DONSON                   | downstream neighbor of SON                                                                           |
| 221698_s_at | CLEC7A                   | C-type lectin domain family 7, member A                                                              |
| 221710_x_at | FAM176B /// LOC100133999 | family with sequence similarity 176, member B /// hypothetical protein LOC100133999                  |
| 221750_at   | HMGCS1                   | 3-hydroxy-3-methylglutaryl-Coenzyme A synthase 1 (soluble)                                           |
| 221759_at   | G6PC3                    | glucose 6 phosphatase, catalytic, 3                                                                  |
| 221779_at   | MICALL1                  | MICAL-like 1                                                                                         |
| 221823_at   | C5orf30                  | chromosome 5 open reading frame 30                                                                   |
| 221830_at   | RAP2A                    | RAP2A, member of RAS oncogene family                                                                 |
| 221842_s_at | ZNF131                   | zinc finger protein 131                                                                              |
| 221854_at   | PKP1                     | plakophilin 1 (ectodermal dysplasia/skin fragility syndrome)                                         |
| 221856_s_at | FAM63A                   | family with sequence similarity 63, member A                                                         |
| 221864_at   | ORAI3                    | ORAI calcium release-activated calcium modulator 3                                                   |
| 221872_at   | RARRES1                  | retinoic acid receptor responder (tazarotene induced) 1                                              |
| 221913_at   | SIRT3                    | sirtuin (silent mating type information regulation 2 homolog) 3 ( <i>S. cerevisiae</i> )             |
| 221922_at   | GPSM2                    | G-protein signaling modulator 2 (AGS3-like, <i>C. elegans</i> )                                      |
| 221934_s_at | DALRD3 /// LOC100133719  | DALR anticodon binding domain containing 3 /// similar to DALR anticodon binding domain containing 3 |
| 221946_at   | C9orf116                 | chromosome 9 open reading frame 116                                                                  |
| 221959_at   | FAM110B                  | family with sequence similarity 110, member B                                                        |
| 221985_at   | KLHL24                   | kelch-like 24 ( <i>Drosophila</i> )                                                                  |
| 222010_at   | TCP1                     | t-complex 1                                                                                          |
| 222039_at   | KIF18B                   | kinesin family member 18B                                                                            |
| 222125_s_at | P4HTM                    | prolyl 4-hydroxylase, transmembrane (endoplasmic reticulum)                                          |
| 222201_s_at | CASP8AP2                 | caspace 8 associated protein 2                                                                       |
| 222212_s_at | LASS2                    | LAG1 homolog, ceramide synthase 2                                                                    |
| 222257_s_at | ACE2                     | angiotensin I converting enzyme (peptidyl-dipeptidase A) 2                                           |
| 222327_x_at | OR7E156P                 | olfactory receptor, family 7, subfamily E, member 156 pseudogene                                     |
| 222379_at   | KCNE4                    | potassium voltage-gated channel, Isk-related family, member 4                                        |
| 31846_at    | RHOD                     | ras homolog gene family, member D                                                                    |
| 35666_at    | SEMA3F                   | sema domain, immunoglobulin domain (Ig), short basic domain, secreted, (semaphorin) 3F               |
| 36499_at    | CELSR2                   | cadherin, EGF LAG seven-pass G-type receptor 2 (flamingo homolog, <i>Drosophila</i> )                |
| 37145_at    | GNLY                     | granulysin                                                                                           |

|             |            |                                                                                                  |
|-------------|------------|--------------------------------------------------------------------------------------------------|
| 37950_at    | PREP       | prolyl endopeptidase                                                                             |
| 40016_g_at  | MAST4      | microtubule associated serine/threonine kinase family member 4                                   |
| 40093_at    | BCAM       | basal cell adhesion molecule (Lutheran blood group)                                              |
| 40148_at    | APBB2      | amyloid beta (A4) precursor protein-binding, family B, member 2                                  |
| 41037_at    | TEAD4      | TEA domain family member 4                                                                       |
| 41113_at    | ZNF500     | zinc finger protein 500                                                                          |
| 41660_at    | CELSR1     | cadherin, EGF LAG seven-pass G-type receptor 1 (flamingo homolog, Drosophila)                    |
| 44654_at    | G6PC3      | glucose 6 phosphatase, catalytic, 3                                                              |
| 49306_at    | RASSF4     | Ras association (RalGDS/AF-6) domain family member 4                                             |
| 51192_at    | SSH3       | slingshot homolog 3 (Drosophila)                                                                 |
| 52159_at    | HEMK1      | HemK methyltransferase family member 1                                                           |
| 52940_at    | SIGIRR     | single immunoglobulin and toll-interleukin 1 receptor (TIR) domain                               |
| 55081_at    | MICALL1    | MICAL-like 1                                                                                     |
| 57540_at    | RBKS       | ribokinase                                                                                       |
| 59437_at    | C9orf116   | chromosome 9 open reading frame 116                                                              |
| 60471_at    | RIN3       | Ras and Rab interactor 3                                                                         |
| 63009_at    | SHQ1       | SHQ1 homolog (S. cerevisiae)                                                                     |
| 200054_at   | ZNF259     | zinc finger protein 259                                                                          |
| 200067_x_at | SNX3       | sorting nexin 3                                                                                  |
| 203625_x_at | SKP2       | S-phase kinase-associated protein 2 (p45)                                                        |
| 206538_at   | MRAS       | muscle RAS oncogene homolog                                                                      |
| 208617_s_at | PTP4A2     | protein tyrosine phosphatase type IVA, member 2                                                  |
| 209640_at   | PML        | promyelocytic leukemia                                                                           |
| 210469_at   | DLG5       | discs, large homolog 5 (Drosophila)                                                              |
| 212256_at   | GALNT10    | UDP-N-acetyl-alpha-D-galactosamine:polypeptide N-acetylgalactosaminyltransferase 10 (GalNAc-T10) |
| 212907_at   | SLC30A1    | Solute carrier family 30 (zinc transporter), member 1                                            |
| 212985_at   | APBB2      | amyloid beta (A4) precursor protein-binding, family B, member 2                                  |
| 213179_at   | RQCD1      | RCD1 required for cell differentiation1 homolog (S. pombe)                                       |
| 213266_at   | TUBGCP4    | Tubulin, gamma complex associated protein 4                                                      |
| 213545_x_at | SNX3       | sorting nexin 3                                                                                  |
| 214657_s_at | NCRNA00084 | non-protein coding RNA 84                                                                        |
| 215304_at   | ---        | ---                                                                                              |
| 216604_s_at | SLC7A8     | solute carrier family 7 (cationic amino acid transporter, y+ system), member 8                   |

|             |         |                                                |
|-------------|---------|------------------------------------------------|
| 217329_x_at | ---     | ---                                            |
| 219177_at   | BXDC2   | brix domain containing 2                       |
| 220540_at   | KCNK15  | potassium channel, subfamily K, member 15      |
| 222036_s_at | MCM4    | minichromosome maintenance complex component 4 |
| 222037_at   | MCM4    | minichromosome maintenance complex component 4 |
| 222129_at   | FAM134A | family with sequence similarity 134, member A  |



**GSE1456 Recurrence Predictor Gene List**

| <b>Probe Set ID</b> | <b>Gene Symbol</b>      | <b>Gene Title</b>                                                    |
|---------------------|-------------------------|----------------------------------------------------------------------|
| 1053_at             | RFC2                    | replication factor C (activator 1) 2, 40kDa                          |
| 1729_at             | TRADD                   | TNFRSF1A-associated via death domain                                 |
| 200737_at           | PGK1                    | phosphoglycerate kinase 1                                            |
| 200738_s_at         | PGK1                    | phosphoglycerate kinase 1                                            |
| 200795_at           | SPARCL1                 | SPARC-like 1 (hevin)                                                 |
| 200812_at           | CCT7                    | chaperonin containing TCP1, subunit 7 (eta)                          |
| 200853_at           | H2AFZ                   | H2A histone family, member Z                                         |
| 200910_at           | CCT3                    | chaperonin containing TCP1, subunit 3 (gamma)                        |
| 200942_s_at         | HSBP1                   | heat shock factor binding protein 1                                  |
| 200980_s_at         | PDHA1                   | pyruvate dehydrogenase (lipoamide) alpha 1                           |
| 201000_at           | AARS                    | alanyl-tRNA synthetase                                               |
| 201037_at           | PFKP                    | phosphofructokinase, platelet                                        |
| 201463_s_at         | LOC100133665 /// TALDO1 | similar to transaldolase /// transaldolase 1                         |
| 201467_s_at         | NQO1                    | NAD(P)H dehydrogenase, quinone 1                                     |
| 201475_x_at         | MARS                    | methionyl-tRNA synthetase                                            |
| 201491_at           | AHSA1                   | AHA1, activator of heat shock 90kDa protein ATPase homolog 1 (yeast) |
| 201494_at           | PRCP                    | prolylcarboxypeptidase (angiotensinase C)                            |
| 201581_at           | TMX4                    | thioredoxin-related transmembrane protein 4                          |
| 201584_s_at         | DDX39                   | DEAD (Asp-Glu-Ala-Asp) box polypeptide 39                            |
| 201590_x_at         | ANXA2                   | annexin A2                                                           |
| 201648_at           | JAK1                    | Janus kinase 1                                                       |
| 201778_s_at         | KIAA0494                | KIAA0494                                                             |
| 201790_s_at         | DHCR7                   | 7-dehydrocholesterol reductase                                       |
| 201791_s_at         | DHCR7                   | 7-dehydrocholesterol reductase                                       |
| 201821_s_at         | TIMM17A                 | translocase of inner mitochondrial membrane 17 homolog A (yeast)     |
| 201898_s_at         | UBE2A                   | ubiquitin-conjugating enzyme E2A (RAD6 homolog)                      |
| 201924_at           | AFF1                    | AF4/FMR2 family, member 1                                            |
| 201959_s_at         | MYCBP2                  | MYC binding protein 2                                                |

|             |                     |                                                                         |
|-------------|---------------------|-------------------------------------------------------------------------|
| 201960_s_at | MYCBP2              | MYC binding protein 2                                                   |
| 201989_s_at | CREBL2              | cAMP responsive element binding protein-like 2                          |
| 202058_s_at | KPNA1               | karyopherin alpha 1 (importin alpha 5)                                  |
| 202154_x_at | TUBB3               | tubulin, beta 3                                                         |
| 202188_at   | NUP93               | nucleoporin 93kDa                                                       |
| 202432_at   | PPP3CB              | protein phosphatase 3 (formerly 2B), catalytic subunit, beta isoform    |
| 202533_s_at | DHFR                | dihydrofolate reductase                                                 |
| 202551_s_at | CRIM1               | cysteine rich transmembrane BMP regulator 1 (chordin-like)              |
| 202552_s_at | CRIM1               | cysteine rich transmembrane BMP regulator 1 (chordin-like)              |
| 202561_at   | TNKS                | tankyrase, TRF1-interacting ankyrin-related ADP-ribose polymerase       |
| 202570_s_at | DLGAP4              | discs, large (Drosophila) homolog-associated protein 4                  |
| 202671_s_at | PDXK                | pyridoxal (pyridoxine, vitamin B6) kinase                               |
| 202697_at   | NUDT21              | nudix (nucleoside diphosphate linked moiety X)-type motif 21            |
| 202705_at   | CCNB2               | cyclin B2                                                               |
| 202712_s_at | CKMT1A /// CKMT1B   | creatine kinase, mitochondrial 1A /// creatine kinase, mitochondrial 1B |
| 202721_s_at | GFPT1               | glutamine-fructose-6-phosphate transaminase 1                           |
| 202771_at   | FAM38A              | family with sequence similarity 38, member A                            |
| 202779_s_at | LOC731049 /// UBE2S | similar to Ubiquitin-conjugating enzyme E2S                             |
| 203027_s_at | MVD                 | mevalonate (diphospho) decarboxylase                                    |
| 203339_at   | SLC25A12            | solute carrier family 25 (mitochondrial carrier, Aralar), member 12     |
| 203350_at   | AP1G1               | adaptor-related protein complex 1, gamma 1 subunit                      |
| 203365_s_at | MMP15               | matrix metalloproteinase 15 (membrane-inserted)                         |
| 203418_at   | CCNA2               | cyclin A2                                                               |
| 203420_at   | FAM8A1              | family with sequence similarity 8, member A1                            |
| 203612_at   | BYSL                | bystin-like                                                             |
| 203633_at   | CPT1A               | carnitine palmitoyltransferase 1A (liver)                               |
| 203634_s_at | CPT1A               | carnitine palmitoyltransferase 1A (liver)                               |
| 203685_at   | BCL2                | B-cell CLL/lymphoma 2                                                   |
| 203697_at   | FRZB                | frizzled-related protein                                                |
| 203755_at   | BUB1B               | budding uninhibited by benzimidazoles 1 homolog beta (yeast)            |
| 203764_at   | DLGAP5              | discs, large (Drosophila) homolog-associated protein 5                  |
| 203799_at   | CD302               | CD302 molecule                                                          |
| 204106_at   | TESK1               | testis-specific kinase 1                                                |

|             |          |                                                                                                   |
|-------------|----------|---------------------------------------------------------------------------------------------------|
| 204281_at   | TEAD4    | TEA domain family member 4                                                                        |
| 204565_at   | ACOT13   | acyl-CoA thioesterase 13                                                                          |
| 204603_at   | EXO1     | exonuclease 1                                                                                     |
| 204793_at   | GPRASP1  | G protein-coupled receptor associated sorting protein 1                                           |
| 204825_at   | MELK     | maternal embryonic leucine zipper kinase                                                          |
| 205024_s_at | RAD51    | RAD51 homolog (RecA homolog, E. coli) (S. cerevisiae)                                             |
| 205219_s_at | GALK2    | galactokinase 2                                                                                   |
| 205224_at   | SURF2    | surfeit 2                                                                                         |
| 205246_at   | PEX13    | peroxisomal biogenesis factor 13                                                                  |
| 205383_s_at | ZBTB20   | zinc finger and BTB domain containing 20                                                          |
| 205661_s_at | FLAD1    | FAD1 flavin adenine dinucleotide synthetase homolog (S. cerevisiae)                               |
| 205933_at   | SETBP1   | SET binding protein 1                                                                             |
| 206199_at   | CEACAM7  | carcinoembryonic antigen-related cell adhesion molecule 7                                         |
| 206240_s_at | ZNF136   | zinc finger protein 136                                                                           |
| 206482_at   | PTK6     | PTK6 protein tyrosine kinase 6                                                                    |
| 206542_s_at | SMARCA2  | SWI/SNF related, matrix associated, actin dependent regulator of chromatin, subfamily a, member 2 |
| 206555_s_at | THUMPD1  | THUMP domain containing 1                                                                         |
| 206949_s_at | RUSC1    | RUN and SH3 domain containing 1                                                                   |
| 207525_s_at | GIPC1    | GIPC PDZ domain containing family, member 1                                                       |
| 207833_s_at | HLCS     | holocarboxylase synthetase (biotin-(propionyl-Coenzyme A-carboxylase (ATP-hydrolysing)) ligase)   |
| 207933_at   | ZP2      | zona pellucida glycoprotein 2 (sperm receptor)                                                    |
| 208084_at   | ITGB6    | integrin, beta 6                                                                                  |
| 208634_s_at | MACF1    | microtubule-actin crosslinking factor 1                                                           |
| 208785_s_at | MAP1LC3B | microtubule-associated protein 1 light chain 3 beta                                               |
| 208799_at   | PSMB5    | proteasome (prosome, macropain) subunit, beta type, 5                                             |
| 208816_x_at | ANXA2P2  | annexin A2 pseudogene 2                                                                           |
| 208968_s_at | CIAPIN1  | cytokine induced apoptosis inhibitor 1                                                            |
| 208977_x_at | TUBB2C   | tubulin, beta 2C                                                                                  |
| 209071_s_at | RGS5     | regulator of G-protein signaling 5                                                                |
| 209103_s_at | UFD1L    | ubiquitin fusion degradation 1 like (yeast)                                                       |
| 209199_s_at | MEF2C    | myocyte enhancer factor 2C                                                                        |
| 209218_at   | SQLE     | squalene epoxidase                                                                                |
| 209260_at   | SFN      | stratifin                                                                                         |

|             |          |                                                                                                           |
|-------------|----------|-----------------------------------------------------------------------------------------------------------|
| 209285_s_at | C3orf63  | chromosome 3 open reading frame 63                                                                        |
| 209336_at   | PWP2     | PWP2 periodic tryptophan protein homolog (yeast)                                                          |
| 209642_at   | BUB1     | budding uninhibited by benzimidazoles 1 homolog (yeast)                                                   |
| 209714_s_at | CDKN3    | cyclin-dependent kinase inhibitor 3                                                                       |
| 209773_s_at | RRM2     | ribonucleotide reductase M2 polypeptide                                                                   |
| 209825_s_at | UCK2     | uridine-cytidine kinase 2                                                                                 |
| 209832_s_at | CDT1     | chromatin licensing and DNA replication factor 1                                                          |
| 210235_s_at | PPF1A1   | protein tyrosine phosphatase, receptor type, f polypeptide (PTPRF), interacting protein (liprin), alpha 1 |
| 210427_x_at | ANXA2    | annexin A2                                                                                                |
| 210627_s_at | MOGS     | mannosyl-oligosaccharide glucosidase                                                                      |
| 210688_s_at | CPT1A    | carnitine palmitoyltransferase 1A (liver)                                                                 |
| 210761_s_at | GRB7     | growth factor receptor-bound protein 7                                                                    |
| 210959_s_at | SRD5A1   | steroid-5-alpha-reductase, alpha polypeptide 1 (3-oxo-5 alpha-steroid delta 4-dehydrogenase alpha 1)      |
| 211080_s_at | NEK2     | NIMA (never in mitosis gene a)-related kinase 2                                                           |
| 211506_s_at | IL8      | interleukin 8                                                                                             |
| 211968_s_at | HSP90AA1 | heat shock protein 90kDa alpha (cytosolic), class A member 1                                              |
| 212070_at   | GPR56    | G protein-coupled receptor 56                                                                             |
| 212141_at   | MCM4     | minichromosome maintenance complex component 4                                                            |
| 212188_at   | KCTD12   | potassium channel tetramerisation domain containing 12                                                    |
| 212189_s_at | COG4     | component of oligomeric golgi complex 4                                                                   |
| 212205_at   | H2AFV    | H2A histone family, member V                                                                              |
| 212289_at   | ANKRD12  | ankyrin repeat domain 12                                                                                  |
| 212498_at   | ---      | ---                                                                                                       |
| 212549_at   | STAT5B   | signal transducer and activator of transcription 5B                                                       |
| 212581_x_at | GAPDH    | glyceraldehyde-3-phosphate dehydrogenase                                                                  |
| 212660_at   | PHF15    | PHD finger protein 15                                                                                     |
| 212675_s_at | CEP68    | centrosomal protein 68kDa                                                                                 |
| 212914_at   | CBX7     | chromobox homolog 7                                                                                       |
| 212936_at   | FAM172A  | family with sequence similarity 172, member A                                                             |
| 212982_at   | ZDHHC17  | zinc finger, DHHC-type containing 17                                                                      |
| 212983_at   | HRAS     | v-Ha-ras Harvey rat sarcoma viral oncogene homolog                                                        |
| 213016_at   | BBX      | bobby sox homolog (Drosophila)                                                                            |
| 213034_at   | KIAA0999 | KIAA0999 protein                                                                                          |

|             |          |                                                                                                   |
|-------------|----------|---------------------------------------------------------------------------------------------------|
| 213058_at   | TTC28    | tetratricopeptide repeat domain 28                                                                |
| 213156_at   | ---      | ---                                                                                               |
| 213158_at   | ---      | ---                                                                                               |
| 213375_s_at | N4BP2L1  | NEDD4 binding protein 2-like 1                                                                    |
| 213453_x_at | GAPDH    | glyceraldehyde-3-phosphate dehydrogenase                                                          |
| 213476_x_at | TUBB3    | tubulin, beta 3                                                                                   |
| 213503_x_at | ANXA2    | annexin A2                                                                                        |
| 213562_s_at | SQLE     | squalene epoxidase                                                                                |
| 213694_at   | RSBN1    | round spermatid basic protein 1                                                                   |
| 213721_at   | SOX2     | SRY (sex determining region Y)-box 2                                                              |
| 213726_x_at | TUBB2C   | tubulin, beta 2C                                                                                  |
| 213796_at   | SPRR1A   | small proline-rich protein 1A                                                                     |
| 213911_s_at | H2AFZ    | H2A histone family, member Z                                                                      |
| 214074_s_at | CTTN     | cortactin                                                                                         |
| 214118_x_at | PCM1     | pericentriolar material 1                                                                         |
| 214444_s_at | PVR      | poliovirus receptor                                                                               |
| 214686_at   | ZNF266   | zinc finger protein 266                                                                           |
| 214710_s_at | CCNB1    | cyclin B1                                                                                         |
| 215171_s_at | TIMM17A  | translocase of inner mitochondrial membrane 17 homolog A (yeast)                                  |
| 216977_x_at | SNRPA1   | small nuclear ribonucleoprotein polypeptide A'                                                    |
| 217356_s_at | PGK1     | phosphoglycerate kinase 1                                                                         |
| 217398_x_at | GAPDH    | glyceraldehyde-3-phosphate dehydrogenase                                                          |
| 217562_at   | FAM5C    | family with sequence similarity 5, member C                                                       |
| 217707_x_at | SMARCA2  | SWI/SNF related, matrix associated, actin dependent regulator of chromatin, subfamily a, member 2 |
| 217733_s_at | TMSB10   | thymosin beta 10                                                                                  |
| 217755_at   | HN1      | hematological and neurological expressed 1                                                        |
| 217772_s_at | MTCH2    | mitochondrial carrier homolog 2 (C. elegans)                                                      |
| 217957_at   | C16orf80 | chromosome 16 open reading frame 80                                                               |
| 218039_at   | NUSAP1   | nucleolar and spindle associated protein 1                                                        |
| 218057_x_at | COX4NB   | COX4 neighbor                                                                                     |
| 218074_at   | FAM96B   | family with sequence similarity 96, member B                                                      |
| 218125_s_at | CCDC25   | coiled-coil domain containing 25                                                                  |
| 218149_s_at | ZNF395   | zinc finger protein 395                                                                           |

|             |              |                                                                                 |
|-------------|--------------|---------------------------------------------------------------------------------|
| 218259_at   | MKL2         | MKL/myocardin-like 2                                                            |
| 218282_at   | EDEM2        | ER degradation enhancer, mannosidase alpha-like 2                               |
| 218290_at   | PLEKHJ1      | pleckstrin homology domain containing, family J member 1                        |
| 218336_at   | PFDN2        | prefoldin subunit 2                                                             |
| 218353_at   | RGS5         | regulator of G-protein signaling 5                                              |
| 218497_s_at | RNASEH1      | ribonuclease H1                                                                 |
| 218498_s_at | ERO1L        | ERO1-like ( <i>S. cerevisiae</i> )                                              |
| 218518_at   | FAM13B       | family with sequence similarity 13, member B                                    |
| 218614_at   | C12orf35     | chromosome 12 open reading frame 35                                             |
| 218662_s_at | NCAPG        | non-SMC condensin I complex, subunit G                                          |
| 218663_at   | NCAPG        | non-SMC condensin I complex, subunit G                                          |
| 218739_at   | ABHD5        | abhydrolase domain containing 5                                                 |
| 218755_at   | KIF20A       | kinesin family member 20A                                                       |
| 218834_s_at | TMEM132A     | transmembrane protein 132A                                                      |
| 218990_s_at | SPRR3        | small proline-rich protein 3                                                    |
| 218996_at   | TFPT         | TCF3 (E2A) fusion partner (in childhood Leukemia)                               |
| 219063_at   | C1orf35      | chromosome 1 open reading frame 35                                              |
| 219143_s_at | RPP25        | ribonuclease P/MRP 25kDa subunit                                                |
| 219203_at   | FAM158A      | family with sequence similarity 158, member A                                   |
| 219270_at   | CHAC1        | ChaC, cation transport regulator homolog 1 ( <i>E. coli</i> )                   |
| 219289_at   | HEATR3       | HEAT repeat containing 3                                                        |
| 219395_at   | ESRP2        | epithelial splicing regulatory protein 2                                        |
| 219429_at   | FA2H         | fatty acid 2-hydroxylase                                                        |
| 219517_at   | ELL3         | elongation factor RNA polymerase II-like 3                                      |
| 219575_s_at | COG8 /// PDF | component of oligomeric golgi complex 8 /// peptide deformylase (mitochondrial) |
| 219646_at   | DEF8         | differentially expressed in FDCP 8 homolog (mouse)                              |
| 219841_at   | AICDA        | activation-induced cytidine deaminase                                           |
| 220200_s_at | SETD8        | SET domain containing (lysine methyltransferase) 8                              |
| 220289_s_at | AIM1L        | absent in melanoma 1-like                                                       |
| 220751_s_at | C5orf4       | chromosome 5 open reading frame 4                                               |
| 221249_s_at | FAM117A      | family with sequence similarity 117, member A                                   |
| 221291_at   | ULBP2        | UL16 binding protein 2                                                          |
| 221364_at   | GRID2        | glutamate receptor, ionotropic, delta 2                                         |

|             |                    |                                                                                                                      |
|-------------|--------------------|----------------------------------------------------------------------------------------------------------------------|
| 221539_at   | EIF4EBP1           | eukaryotic translation initiation factor 4E binding protein 1                                                        |
| 221566_s_at | NOL3               | nucleolar protein 3 (apoptosis repressor with CARD domain)                                                           |
| 221572_s_at | CELSR3 /// SLC26A6 | cadherin, EGF LAG seven-pass G-type receptor 3 (flamingo homolog, Drosophila) /// solute carrier family 26),member 6 |
| 221597_s_at | TMEM208            | transmembrane protein 208                                                                                            |
| 221824_s_at | MARCH8             | membrane-associated ring finger (C3HC4) 8                                                                            |
| 221937_at   | ---                | ---                                                                                                                  |
| 222129_at   | FAM134A            | family with sequence similarity 134, member A                                                                        |
| 222216_s_at | MRPL17             | mitochondrial ribosomal protein L17                                                                                  |
| 222234_s_at | DBNDD1             | dysbindin (dystrobrevin binding protein 1) domain containing 1                                                       |
| 222368_at   | ---                | ---                                                                                                                  |
| 41037_at    | TEAD4              | TEA domain family member 4                                                                                           |
| 49077_at    | PPME1              | protein phosphatase methylesterase 1                                                                                 |

### Adriamycin Chemosensitivity Signature Gene List

| Probe Set ID | Gene Symbol | Gene Title                                                                                         |
|--------------|-------------|----------------------------------------------------------------------------------------------------|
| 209008_x_at  | KRT8        | keratin 8                                                                                          |
| 201089_at    | ATP6V1B2    | ATPase, H <sup>+</sup> transporting, lysosomal 56/58kDa, V1 subunit B2                             |
| 209873_s_at  | PKP3        | plakophilin 3                                                                                      |
| 210715_s_at  | SPINT2      | serine peptidase inhibitor, Kunitz type, 2                                                         |
| 215254_at    | RCAN1       | regulator of calcineurin 1                                                                         |
| 216074_x_at  | WWC1        | WW and C2 domain containing 1                                                                      |
| 221601_s_at  | FAIM3       | Fas apoptotic inhibitory molecule 3                                                                |
| 203541_s_at  | KLF9        | Kruppel-like factor 9                                                                              |
| 200606_at    | DSP         | desmoplakin                                                                                        |
| 202947_s_at  | GYPC        | glycophorin C (Gerbich blood group)                                                                |
| 214492_at    | SGCD        | sarcoglycan, delta (35kDa dystrophin-associated glycoprotein)                                      |
| 205168_at    | DDR2        | discoidin domain receptor tyrosine kinase 2                                                        |
| 209212_s_at  | KLF5        | Kruppel-like factor 5 (intestinal)                                                                 |
| 200752_s_at  | CAPN1       | calpain 1, (mu/l) large subunit                                                                    |
| 210198_s_at  | PLP1        | proteolipid protein 1                                                                              |
| 201141_at    | GPNMB       | glycoprotein (transmembrane) nmb                                                                   |
| 266_s_at     | CD24        | CD24 molecule                                                                                      |
| 201596_x_at  | KRT18       | keratin 18                                                                                         |
| 202185_at    | PLOD3       | procollagen-lysine, 2-oxoglutarate 5-dioxygenase 3                                                 |
| 210150_s_at  | LAMA5       | laminin, alpha 5                                                                                   |
| 201079_at    | SYNGR2      | synaptogyrin 2                                                                                     |
| 203028_s_at  | CYBA        | cytochrome b-245, alpha polypeptide                                                                |
| 206584_at    | LY96        | lymphocyte antigen 96                                                                              |
| 205973_at    | FEZ1        | fasciculation and elongation protein zeta 1 (zygin I)                                              |
| 201983_s_at  | EGFR        | epidermal growth factor receptor (erythroblastic leukemia viral (v-erb-b) oncogene homolog, avian) |
| 212915_at    | PDZRN3      | PDZ domain containing ring finger 3                                                                |
| 207517_at    | LAMC2       | laminin, gamma 2                                                                                   |
| 214297_at    | CSPG4       | chondroitin sulfate proteoglycan 4                                                                 |



|             |          |                                                                        |
|-------------|----------|------------------------------------------------------------------------|
| 200871_s_at | PSAP     | prosaposin                                                             |
| 201839_s_at | EPCAM    | epithelial cell adhesion molecule                                      |
| 210139_s_at | PMP22    | peripheral myelin protein 22                                           |
| 203585_at   | ZNF185   | zinc finger protein 185 (LIM domain)                                   |
| 203315_at   | NCK2     | NCK adaptor protein 2                                                  |
| 212925_at   | C19orf21 | chromosome 19 open reading frame 21                                    |
| 217234_s_at | EZR      | ezrin                                                                  |
| 209016_s_at | KRT7     | keratin 7                                                              |
| 213466_at   | RAB40C   | RAB40C, member RAS oncogene family                                     |
| 214845_s_at | CALU     | calumenin                                                              |
| 201004_at   | SSR4     | signal sequence receptor, delta (translocon-associated protein delta)  |
| 209236_at   | SLC23A2  | solute carrier family 23 (nucleobase transporters), member 2           |
| 208682_s_at | MAGED2   | melanoma antigen family D, 2                                           |
| 203094_at   | MAD2L1BP | MAD2L1 binding protein                                                 |
| 202260_s_at | STXBP1   | syntaxin binding protein 1                                             |
| 207732_s_at | DLG3     | discs, large homolog 3 (Drosophila)                                    |
| 214040_s_at | GSN      | gelsolin (amyloidosis, Finnish type)                                   |
| 203826_s_at | PITPNM1  | phosphatidylinositol transfer protein, membrane-associated 1           |
| 206427_s_at | MLANA    | melan-A                                                                |
| 41644_at    | SASH1    | SAM and SH3 domain containing 1                                        |
| 204457_s_at | GAS1     | growth arrest-specific 1                                               |
| 208937_s_at | ID1      | inhibitor of DNA binding 1, dominant negative helix-loop-helix protein |
| 212419_at   | ZCCHC24  | zinc finger, CCHC domain containing 24                                 |
| 204040_at   | RNF144A  | ring finger protein 144A                                               |
| 203391_at   | FKBP2    | FK506 binding protein 2, 13kDa                                         |
| 204679_at   | KCNK1    | potassium channel, subfamily K, member 1                               |
| 214632_at   | NRP2     | neuropilin 2                                                           |
| 207233_s_at | MITF     | microphthalmia-associated transcription factor                         |
| 212531_at   | LCN2     | lipocalin 2                                                            |
| 203979_at   | CYP27A1  | cytochrome P450, family 27, subfamily A, polypeptide 1                 |
| 211066_x_at | PCDHGC3  | protocadherin gamma subfamily C, 3                                     |
| 206560_s_at | MIA      | melanoma inhibitory activity                                           |
| 213355_at   | ST3GAL6  | ST3 beta-galactoside alpha-2,3-sialyltransferase 6                     |

|             |        |                                                                            |
|-------------|--------|----------------------------------------------------------------------------|
| 205780_at   | BIK    | BCL2-interacting killer (apoptosis-inducing)                               |
| 200958_s_at | SDCBP  | syndecan binding protein (syntenin)                                        |
| 203713_s_at | LLGL2  | lethal giant larvae homolog 2 (Drosophila)                                 |
| 208614_s_at | FLNB   | filamin B, beta (actin binding protein 278)                                |
| 203954_x_at | CLDN3  | claudin 3                                                                  |
| 203556_at   | ZHX2   | zinc fingers and homeoboxes 2                                              |
| 202016_at   | MEST   | mesoderm specific transcript homolog (mouse)                               |
| 213843_x_at | SLC6A8 | solute carrier family 6 (neurotransmitter transporter, creatine), member 8 |
| 201178_at   | FBXO7  | F-box protein 7                                                            |
| 201578_at   | PODXL  | podocalyxin-like                                                           |
| 209306_s_at | SWAP70 | SWAP-70 protein                                                            |
| 209170_s_at | GPM6B  | glycoprotein M6B                                                           |
| 210130_s_at | TM7SF2 | transmembrane 7 superfamily member 2                                       |
| 214154_s_at | PKP2   | plakophilin 2                                                              |
| 203603_s_at | ZEB2   | zinc finger E-box binding homeobox 2                                       |
| 206234_s_at | MMP17  | matrix metalloproteinase 17 (membrane-inserted)                            |
| 204867_at   | GCHFR  | GTP cyclohydrolase I feedback regulator                                    |
| 201015_s_at | JUP    | junction plakoglobin                                                       |
| 208626_s_at | VAT1   | vesicle amine transport protein 1 homolog (T. californica)                 |

### Docetaxel Chemosensitivity Signature Gene List

| Probe Set ID | Gene Symbol | Gene Title                                                               |
|--------------|-------------|--------------------------------------------------------------------------|
| 200912_s_at  | EIF4A2      | eukaryotic translation initiation factor 4A, isoform 2                   |
| 208827_at    | PSMB6       | proteasome (prosome, macropain) subunit, beta type, 6                    |
| 212082_s_at  | MYL6        | myosin, light chain 6, alkali, smooth muscle and non-muscle              |
| 210125_s_at  | BANF1       | barrier to autointegration factor 1                                      |
| 213444_at    | ZNF862      | zinc finger protein 862                                                  |
| 213111_at    | PIP5K3      | phosphatidylinositol-3-phosphate/phosphatidylinositol 5-kinase, type III |
| 214900_at    | ZKSCAN1     | zinc finger with KRAB and SCAN domains 1                                 |
| 210023_s_at  | PCGF1       | polycomb group ring finger 1                                             |
| 200695_at    | PPP2R1A     | protein phosphatase 2 (formerly 2A), regulatory subunit A, alpha isoform |
| 203522_at    | CCS         | copper chaperone for superoxide dismutase                                |
| 204608_at    | ASL         | argininosuccinate lyase                                                  |
| 213949_s_at  | DOHH        | deoxyhypusine hydroxylase/monooxygenase                                  |
| 202991_at    | STARD3      | StAR-related lipid transfer (START) domain containing 3                  |
| 217500_at    | TIAL1       | TIA1 cytotoxic granule-associated RNA binding protein-like 1             |
| 200033_at    | DDX5        | DEAD (Asp-Glu-Ala-Asp) box polypeptide 5                                 |
| 203117_s_at  | PAN2        | PAN2 poly(A) specific ribonuclease subunit homolog (S. cerevisiae)       |
| 220946_s_at  | SETD2       | SET domain containing 2                                                  |
| 201917_s_at  | SLC25A36    | solute carrier family 25, member 36                                      |
| 208686_s_at  | BRD2        | bromodomain containing 2                                                 |
| 214993_at    | ASPHD1      | aspartate beta-hydroxylase domain containing 1                           |
| 201238_s_at  | CAPZA2      | capping protein (actin filament) muscle Z-line, alpha 2                  |
| 218018_at    | PDXK        | pyridoxal (pyridoxine, vitamin B6) kinase                                |
| 216940_x_at  | YBX1        | Y box binding protein 1                                                  |
| 203220_s_at  | TLE1        | transducin-like enhancer of split 1 (E(sp1) homolog, Drosophila)         |
| 200852_x_at  | GNB2        | guanine nucleotide binding protein (G protein), beta polypeptide 2       |
| 208373_s_at  | P2RY6       | pyrimidinergic receptor P2Y, G-protein coupled, 6                        |
| 217910_x_at  | MLX         | MAX-like protein X                                                       |
| 212608_s_at  | NA          | NA                                                                       |

|             |          |                                                                    |
|-------------|----------|--------------------------------------------------------------------|
| 206233_at   | B4GALT6  | UDP-Gal:betaGlcNAc beta 1,4- galactosyltransferase, polypeptide 6  |
| 213287_s_at | KRT10    | keratin 10                                                         |
| 203006_at   | INPP5A   | inositol polyphosphate-5-phosphatase, 40kDa                        |
| 216022_at   | NA       | NA                                                                 |
| 207809_s_at | ATP6AP1  | ATPase, H <sup>+</sup> transporting, lysosomal accessory protein 1 |
| 206894_at   | APOA4    | apolipoprotein A-IV                                                |
| 209008_x_at | KRT8     | keratin 8                                                          |
| 213704_at   | RABGGTB  | Rab geranylgeranyltransferase, beta subunit                        |
| 213104_at   | C16orf42 | chromosome 16 open reading frame 42                                |
| 203314_at   | GTPBP6   | GTP binding protein 6 (putative)                                   |
| 203667_at   | TBCA     | tubulin folding cofactor A                                         |
| 202338_at   | TK1      | thymidine kinase 1, soluble                                        |
| 209903_s_at | ATR      | ataxia telangiectasia and Rad3 related                             |
| 212083_at   | TEX261   | testis expressed 261                                               |
| 201384_s_at | NBR1     | neighbor of BRCA1 gene 1                                           |
| 214643_x_at | BIN1     | bridging integrator 1                                              |
| 210070_s_at | CPT1B    | carnitine palmitoyltransferase 1B (muscle)                         |
| 202030_at   | BCKDK    | branched chain ketoacid dehydrogenase kinase                       |
| 217189_s_at | SMG7     | Smg-7 homolog, nonsense mediated mRNA decay factor (C. elegans)    |
| 210352_at   | BRD8     | bromodomain containing 8                                           |
| 221487_s_at | ENSA     | endosulfine alpha                                                  |
| 203286_at   | RNF44    | ring finger protein 44                                             |

Barry et al. Table S5

| <b>Multivariate ANOVA Model</b> | <b>Source</b>       | <b>df</b> | <b>Pillai</b> | <b>F</b>  | <b>df1/df2</b> | <b>p-value</b> |
|---------------------------------|---------------------|-----------|---------------|-----------|----------------|----------------|
| PCA (2 dimensions)              | Replicate           | 17        | 1.8221        | 18.67     | 34/62          | <2e-16         |
|                                 | % Tumor Cellularity | 1         | 0.0763        | 1.24      | 2/30           | 0.304          |
|                                 | Res.                | 31        |               |           |                |                |
| <b>ANOVA Model</b>              | <b>Source</b>       | <b>df</b> | <b>SS</b>     | <b>MS</b> | <b>F</b>       | <b>p-value</b> |
| ER Pathway                      | Replicate           | 17        | 5.5201        | 0.3247    | 81.3899        | 5.80E-21       |
|                                 | % Tumor Cellularity | 1         | 0.0021        | 0.0021    | 0.5356         | 0.4697         |
|                                 | Res.                | 31        | 0.1237        | 0.004     |                |                |
| Recurrence                      | Replicate           | 17        | 1.0153        | 0.0597    | 7.7631         | 5.50E-07       |
|                                 | % Tumor Cellularity | 1         | 0.0345        | 0.0345    | 4.4885         | 0.0422         |
|                                 | Res.                | 31        | 0.2385        | 0.0077    |                |                |
| Adriamycin                      | Replicate           | 17        | 3.8809        | 0.2283    | 8.2298         | 2.80E-07       |
|                                 | % Tumor Cellularity | 1         | 0.0249        | 0.0249    | 0.899          | 0.3504         |
|                                 | Replicate           | 31        | 0.8599        | 0.0277    |                |                |
| Docetaxel                       | Replicate           | 17        | 1.9565        | 0.1151    | 6.0248         | 8.40E-06       |
|                                 | % Tumor Cellularity | 1         | 0.0292        | 0.0292    | 1.5306         | 0.2253         |
|                                 | Res.                | 31        | 0.5922        | 0.0191    |                |                |
